# Supplementary material for: The Influence of Orthopedic Surgery on Circulating Metabolite Levels, and their Associations with the Incidence of Postoperative Delirium
Source: MDPI journal article supplement (doi:10.3390/metabo12070616), 2022-07-01
Supplement: s1 [file s1]

**Supplementary Table S1.** Baseline characteristics of control and delirium groups.

|                                                                                               | Control (n=26)   | Delirium (n=28)  | Statistical test | p-Value            |
|-----------------------------------------------------------------------------------------------|------------------|------------------|------------------|--------------------|
| Age, mean (SD)                                                                                | 75.8 (5.2)       | 76.2 (5.7)       | T= -0.224        | 0.82               |
| Sex, female (%)                                                                               | 14/26            | 15/28            | X2= 0            | 1.00               |
| Type of surgery (hip vs knee), hip (%)                                                        | 15 out of 26     | 9 out of 28      | X2=2.604         | 0.11               |
| Years in Education, mean (SD)                                                                 | 11.4 (2.3)       | 11.3 (1.8)       | MWU= 363         | 0.985              |
| BADL Score (Range:0-9), median (IQR)                                                          | 3 (1-3)          | 3 (1-3)          | MWU=356          | 0.884              |
| Vertical Visual Analogue Pain Scale pain at rest, mean (SD)                                   | 26.5 (22.7)      | 19.7 (24.9)      | MWU=260.5        | 0.107              |
| Vertical Visual Analogue Pain Scale pain on movement, mean (SD)                               | 75.7 (14.7)      | 65.0 (24.0)      | T= 1.969         | 0.055              |
| Estimated IQ, mean (SD)                                                                       | 111.7 (7.5)      | 106.8 (9.3)      | T=2.093          | <b>0.041*</b>      |
| CLOX 1 score, (Range:6-15), median (IQR)                                                      | 13 (11-14)       | 12 (11-13)       | MWU=303.5        | 0.286              |
| Letter fluency mean, mean (SD)                                                                | 11.5 (3.9)       | 10.4 (4.2)       | T= 1.077         | 0.286              |
| Category fluency mean, mean (SD)                                                              | 16.3 (3.8)       | 15.2 (3.7)       | T= 1.106         | 0.274              |
| Stroop colour-word score, mean (SD)                                                           | 22.3 (6.1)       | 20.1 (6.8)       | T= 1.247         | 0.218              |
| Time taken to complete Colour Trails 2 (seconds), mean (SD)                                   | 146.4 (50.2)     | 205.2 (115.1)    | MWU=235.5        | <b>0.041*</b>      |
| New York university paragraph recall test (immediate recall score), (Range:1-9), median (IQR) | 5.44 (3.83-6.89) | 4.00 (3.00-5.27) | MWU=237.5        | <b>0.026*</b>      |
| New York university paragraph recall test (delayed recall score), (Range:0-12), median (IQR), | 5 (3-8)          | 4 (2-5.75)       | MWU=251.5        | 0.050              |
| American Society Anesthesiologists (ASA) physical status (I/II/III)                           | 0/22/3           | 1/21/6           | MWU=328          | 0.564              |
| Charlson Comorbidity Index (CCI) 0/1/2/3                                                      | 15/8/3/0         | 11/11/4/1        | MWU=286.5        | 0.209              |
| Mini Mental State Examination Score (MMSE), mean (SD)                                         | 27.7 (1.9)       | 26.0 (2.8)       | MWU= 203         | <b>0.012*</b>      |
| A $\beta$ 42 in CSF, mean (SD)                                                                | 613.88 (190.34)  | 453.01 (175.77)  | T=3.198          | <b>0.002**</b>     |
| t-tau in CSF, mean (SD)                                                                       | 291.32 (181.73)  | 401.01 (233.02)  | MWU=204          | <b>0.009**</b>     |
| p-tau in CSF, mean (SD)                                                                       | 51.55 (21.98)    | 63.88 (23.45)    | MWU=201          | <b>0.008**</b>     |
| p-tau/A $\beta$ 42 in CSF, man (SD)                                                           | 0.10 (0.08)      | 0.17 (0.09)      | MWU=122          | <b>4.60E-05***</b> |

Significant *p*-values are shown in bold. \**p* < 0.05, \*\**p* < 0.01, \*\*\* *p* < 0.001 control vs. delirium. CCI: Charlson Comorbidity Index; BADL: Bristol activities of daily living scale; CLOX: clock drawing test; IQR: Interquartile range; ASA: American Society Anesthesiologists; MMSE: Mini mental state examination; SD: standard deviation; T: Student's t.test; X2: Chi-square test; MWU: Mann-Whitney U test.

**Supplementary Table S2.** Univariate analysis of all the metabolites between pre and post-op.

| No. | Name    | Pre-op                | Post-op               | <i>p</i> -Value    | q-Value            | Fold change | % change |
|-----|---------|-----------------------|-----------------------|--------------------|--------------------|-------------|----------|
|     |         | Mean (SD)             | Mean (SD)             |                    |                    |             |          |
| 1   | C0      | <b>37.117 (7.851)</b> | <b>34.859 (8.284)</b> | <b>0.0145*</b>     | <b>0.0175*</b>     | -1.06       | -6.08    |
| 2   | C14:1   | 0.2550 (0.0697)       | 0.2216 (0.0683)       | <b>0.0033**</b>    | <b>0.0040**</b>    | -1.15       | -13.11   |
| 3   | C14:2   | 0.0425 (0.0213)       | 0.0389 (0.0128)       | 0.3882             | 0.4185             | -1.09       | -8.50    |
| 4   | C16     | 0.1252 (0.0353)       | 0.0987 (0.0283)       | <b>2.00E-05***</b> | <b>2.91E-05***</b> | -1.27       | -21.15   |
| 5   | C16:1   | 0.0410 (0.0193)       | 0.0347 (0.0136)       | <b>0.0133*</b>     | <b>0.0162*</b>     | -1.18       | -15.45   |
| 6   | C18     | 0.0380 (0.0142)       | 0.0321 (0.0137)       | 0.9300             | 0.9437             | -1.18       | -15.59   |
| 7   | C18:1   | 0.1699 (0.0531)       | 0.1329 (0.0358)       | <b>5.53E-08***</b> | <b>1.12E-07***</b> | -1.28       | -21.74   |
| 8   | C2      | 8.429 (3.594)         | 6.817 (2.580)         | <b>0.0001***</b>   | <b>0.0002***</b>   | -1.24       | -19.13   |
| 9   | C3      | 0.2251 (0.0899)       | 0.1962 (0.0795)       | <b>0.0175*</b>     | <b>0.0206*</b>     | -1.15       | -12.86   |
| 10  | C5      | 0.1139 (0.0495)       | 0.1124 (0.0460)       | 0.8700             | 0.8894             | -1.01       | -1.35    |
| 11  | C5:1-DC | 0.0205 (0.0116)       | 0.0219 (0.0201)       | 0.8001             | 0.8302             | 1.07        | 6.76     |

|    |                |                  |                   |                    |                    |       |        |
|----|----------------|------------------|-------------------|--------------------|--------------------|-------|--------|
| 12 | C7-DC          | 0.0263 (0.0118)  | 0.0224 (0.0113)   | <b>0.0182*</b>     | <b>0.0211*</b>     | -1.17 | -14.77 |
| 13 | Ala            | 339.852 (82.072) | 309.259 (87.565)  | <b>9.03E-11***</b> | <b>4.02E-10***</b> | -1.10 | -9.00  |
| 14 | Arg            | 82.444 (16.322)  | 79.122 (17.331)   | <b>3.49E-10***</b> | <b>1.22E-09***</b> | -1.04 | -4.03  |
| 15 | Asn            | 37.856 (6.583)   | 33.211 (6.366)    | <b>6.36E-10***</b> | <b>1.94E-09***</b> | -1.14 | -12.27 |
| 16 | Asp            | 3.950 (2.218)    | 4.314 (2.111)     | 0.0679             | 0.0762             | 1.09  | 9.24   |
| 17 | Cit            | 33.932 (7.907)   | 31.426 (7.261)    | <b>3.22E-09***</b> | <b>8.08E-09***</b> | -1.08 | -7.38  |
| 18 | Gln            | 727.778 (80.901) | 689.185 (109.631) | <b>4.20E-05***</b> | <b>5.91E-05***</b> | -1.06 | -5.30  |
| 19 | Glu            | 41.863 (18.310)  | 47.680 (21.796)   | <b>0.0444*</b>     | 0.0502             | 1.14  | 13.89  |
| 20 | Gly            | 217.630 (81.782) | 186.906 (67.247)  | <b>4.21E-07***</b> | <b>7.17E-07***</b> | -1.16 | -14.12 |
| 21 | His            | 71.702 (8.210)   | 69.993 (9.867)    | <b>0.0002***</b>   | <b>0.0003***</b>   | -1.02 | -2.38  |
| 22 | Ile            | 68.067 (13.860)  | 65.019 (15.196)   | <b>1.36E-07***</b> | <b>2.54E-07***</b> | -1.05 | -4.48  |
| 23 | Leu            | 135.994 (34.073) | 120.206 (27.714)  | <b>4.40E-05***</b> | <b>6.13E-05***</b> | -1.13 | -11.61 |
| 24 | Lys            | 167.074 (25.474) | 159.135 (28.068)  | <b>3.34E-08***</b> | <b>7.09E-08***</b> | -1.05 | -4.75  |
| 25 | Met            | 20.970 (3.360)   | 19.409 (3.757)    | <b>0.0016**</b>    | <b>0.0020**</b>    | -1.08 | -7.44  |
| 26 | Orn            | 52.052 (13.385)  | 44.398 (10.276)   | <b>2.05E-08***</b> | <b>4.42E-08***</b> | -1.17 | -14.70 |
| 27 | Phe            | 59.019 (9.523)   | 52.106 (10.498)   | <b>1.72E-09***</b> | <b>4.86E-09***</b> | -1.13 | -11.71 |
| 28 | Pro            | 188.019 (35.651) | 169.074 (32.092)  | <b>2.17E-11***</b> | <b>1.11E-10***</b> | -1.11 | -10.08 |
| 29 | Ser            | 86.093 (18.829)  | 78.474 (17.597)   | <b>3.08E-07***</b> | <b>5.31E-07***</b> | -1.10 | -8.85  |
| 30 | Thr            | 92.952 (22.316)  | 83.239 (22.922)   | <b>8.81E-07***</b> | <b>1.46E-06***</b> | -1.12 | -10.45 |
| 31 | Trp            | 47.565 (10.172)  | 30.528 (7.719)    | <b>3.00E-06***</b> | <b>4.65E-06***</b> | -1.56 | -35.82 |
| 32 | Tyr            | 55.280 (13.346)  | 48.341 (11.136)   | <b>2.44E-07***</b> | <b>4.32E-07***</b> | -1.14 | -12.55 |
| 33 | Val            | 195.870 (34.450) | 181.315 (36.797)  | <b>1.09E-12***</b> | <b>6.84E-12***</b> | -1.08 | -7.43  |
| 34 | ADMA           | 0.4156 (0.2037)  | 0.3999 (0.1437)   | 0.9760             | 0.9831             | -1.04 | -3.79  |
| 35 | Creatinine     | 66.485 (26.115)  | 58.806 (18.885)   | <b>0.0137*</b>     | <b>0.0166*</b>     | -1.13 | -11.55 |
| 36 | Kynurenine     | 2.7307 (0.6931)  | 2.2793 (0.5139)   | <b>1.05E-07***</b> | <b>2.01E-07***</b> | -1.20 | -16.53 |
| 37 | Met-SO         | 0.9610 (0.3986)  | 0.6138 (0.3967)   | <b>6.00E-05***</b> | <b>8.20E-05***</b> | -1.57 | -36.13 |
| 38 | Putrescine     | 0.1098 (0.0411)  | 0.1281 (0.0481)   | <b>0.0051**</b>    | <b>0.0063**</b>    | 1.17  | 16.68  |
| 39 | Sarcosine      | 0.9909 (0.3924)  | 1.0252 (0.3361)   | 0.1504             | 0.1635             | 1.03  | 3.46   |
| 40 | Serotonin      | 0.0959 (0.0920)  | 0.0980 (0.1062)   | 0.9894             | 0.9894             | 1.02  | 2.26   |
| 41 | Spermidine     | 0.1626 (0.0917)  | 0.1551 (0.0365)   | 0.1201             | 0.1316             | -1.05 | -4.61  |
| 42 | Spermine       | 0.1852 (0.0336)  | 0.2002 (0.0370)   | <b>0.0177*</b>     | <b>0.0207*</b>     | 1.08  | 8.14   |
| 43 | t4-OH-Pro      | 9.7676 (3.8200)  | 8.0417 (2.5102)   | <b>2.87E-07***</b> | <b>5.01E-07***</b> | -1.21 | -17.67 |
| 44 | Taurine        | 55.731 (12.820)  | 52.226 (13.928)   | <b>0.0300*</b>     | <b>0.0342*</b>     | -1.07 | -6.29  |
| 45 | SDMA           | 0.6236 (0.4002)  | 0.6133 (0.2387)   | 0.6921             | 0.7346             | -1.02 | -1.64  |
| 46 | lysoPC a C16:0 | 70.343 (17.236)  | 53.454 (14.489)   | <b>1.63E-12***</b> | <b>9.78E-12***</b> | -1.32 | -24.01 |
| 47 | lysoPC a C16:1 | 2.4867 (0.6631)  | 1.9732 (0.5907)   | <b>5.80E-13***</b> | <b>3.81E-12***</b> | -1.26 | -20.65 |
| 48 | lysoPC a C17:0 | 1.4574 (0.4787)  | 1.1094 (0.3656)   | <b>1.03E-11***</b> | <b>5.47E-11***</b> | -1.31 | -23.88 |
| 49 | lysoPC a C18:0 | 19.126 (5.709)   | 14.162 (4.590)    | <b>2.27E-10***</b> | <b>8.95E-10***</b> | -1.35 | -25.95 |
| 50 | lysoPC a C18:1 | 16.827 (4.167)   | 13.518 (3.809)    | <b>4.07E-10***</b> | <b>1.37E-09***</b> | -1.24 | -19.66 |
| 51 | lysoPC a C18:2 | 20.539 (5.726)   | 15.811 (4.651)    | <b>6.45E-10***</b> | <b>1.94E-09***</b> | -1.30 | -23.02 |
| 52 | lysoPC a C20:3 | 2.2506 (0.5592)  | 1.7666 (0.5556)   | <b>1.76E-09***</b> | <b>4.86E-09***</b> | -1.27 | -21.50 |
| 53 | lysoPC a C20:4 | 5.2989 (1.6855)  | 4.1463 (1.5812)   | <b>3.40E-09***</b> | <b>8.38E-09***</b> | -1.28 | -21.75 |
| 54 | lysoPC a C24:0 | 0.2877 (0.1329)  | 0.2774 (0.1562)   | 0.8195             | 0.8440             | -1.04 | -3.61  |
| 55 | lysoPC a C26:0 | 0.3730 (0.2477)  | 0.4269 (0.2575)   | 0.0719             | 0.0801             | 1.14  | 14.44  |
| 56 | lysoPC a C26:1 | 0.3161 (0.1700)  | 0.3320 (0.2115)   | 0.4590             | 0.4910             | 1.05  | 5.02   |
| 57 | lysoPC a C28:0 | 0.4259 (0.1942)  | 0.4496 (0.1861)   | 0.0923             | 0.1019             | 1.06  | 5.57   |
| 58 | lysoPC a C28:1 | 0.6581 (0.2870)  | 0.6325 (0.2691)   | 0.7112             | 0.7492             | -1.04 | -3.89  |
| 59 | PC aa C24:0    | 0.1491 (0.0929)  | 0.1741 (0.0879)   | <b>0.0169*</b>     | <b>0.0201*</b>     | 1.17  | 16.77  |
| 60 | PC aa C28:1    | 2.0666 (0.5494)  | 1.6401 (0.4630)   | <b>5.32E-13***</b> | <b>3.67E-12***</b> | -1.26 | -20.64 |
| 61 | PC aa C30:0    | 3.1761 (0.9207)  | 2.4087 (0.6805)   | <b>1.35E-16***</b> | <b>2.66E-15***</b> | -1.32 | -24.16 |
| 62 | PC aa C32:0    | 10.3450 (2.8258) | 8.2120 (2.441)    | <b>3.01E-10***</b> | <b>1.09E-09***</b> | -1.26 | -20.62 |
| 63 | PC aa C32:1    | 16.531 (6.563)   | 13.421 (5.329)    | <b>3.00E-10***</b> | <b>1.09E-09***</b> | -1.23 | -18.82 |
| 64 | PC aa C32:3    | 0.2677 (0.0644)  | 0.2124 (0.0567)   | <b>2.46E-10***</b> | <b>9.43E-10***</b> | -1.26 | -20.67 |

|     |             |                  |                  |                    |                    |       |        |
|-----|-------------|------------------|------------------|--------------------|--------------------|-------|--------|
| 65  | PC aa C34:1 | 220.667 (57.438) | 184.644 (50.432) | <b>1.24E-16***</b> | <b>2.66E-15***</b> | -1.20 | -16.32 |
| 66  | PC aa C34:2 | 313.444 (82.662) | 250.848 (69.393) | <b>8.57E-17***</b> | <b>2.37E-15***</b> | -1.25 | -19.97 |
| 67  | PC aa C34:3 | 12.3694 (3.4680) | 9.9346 (2.8722)  | <b>6.21E-18***</b> | <b>4.28E-16***</b> | -1.25 | -19.68 |
| 68  | PC aa C34:4 | 1.0889 (0.3722)  | 0.8570 (0.3104)  | <b>2.42E-09***</b> | <b>6.30E-09***</b> | -1.27 | -21.30 |
| 69  | PC aa C36:0 | 2.7461 (0.9444)  | 2.4156 (0.8343)  | <b>1.56E-07***</b> | <b>2.87E-07***</b> | -1.14 | -12.03 |
| 70  | PC aa C36:1 | 38.889 (11.114)  | 32.026 (9.277)   | <b>7.09E-14***</b> | <b>6.99E-13***</b> | -1.21 | -17.65 |
| 71  | PC aa C36:2 | 173.185 (38.597) | 136.102 (33.082) | <b>1.34E-10***</b> | <b>5.78E-10***</b> | -1.27 | -21.41 |
| 72  | PC aa C36:3 | 104.572 (24.265) | 82.548 (21.077)  | <b>2.29E-11***</b> | <b>1.13E-10***</b> | -1.27 | -21.06 |
| 73  | PC aa C36:4 | 167.263 (49.356) | 133.520 (42.546) | <b>4.80E-10***</b> | <b>1.54E-09***</b> | -1.25 | -20.17 |
| 74  | PC aa C36:5 | 22.134 (8.430)   | 17.750 (6.915)   | <b>5.96E-21***</b> | <b>8.22E-19***</b> | -1.25 | -19.81 |
| 75  | PC aa C36:6 | 0.6154 (0.1984)  | 0.4881 (0.1775)  | <b>2.52E-17***</b> | <b>8.69E-16***</b> | -1.26 | -20.68 |
| 76  | PC aa C38:0 | 2.3172 (0.6347)  | 1.8250 (0.4890)  | <b>2.35E-09***</b> | <b>6.30E-09***</b> | -1.27 | -21.24 |
| 77  | PC aa C38:3 | 41.515 (10.820)  | 33.167 (9.937)   | <b>6.71E-14***</b> | <b>6.99E-13***</b> | -1.25 | -20.11 |
| 78  | PC aa C38:4 | 88.446 (26.965)  | 72.270 (24.735)  | <b>2.42E-09***</b> | <b>6.30E-09***</b> | -1.22 | -18.29 |
| 79  | PC aa C38:5 | 46.031 (12.684)  | 37.211 (11.497)  | <b>4.92E-15***</b> | <b>5.97E-14***</b> | -1.24 | -19.16 |
| 80  | PC aa C38:6 | 63.602 (17.157)  | 51.870 (14.439)  | <b>3.68E-09***</b> | <b>8.91E-09***</b> | -1.23 | -18.45 |
| 81  | PC aa C40:2 | 0.4787 (0.1232)  | 0.4154 (0.1185)  | <b>5.80E-05***</b> | <b>8.00E-05***</b> | -1.15 | -13.23 |
| 82  | PC aa C40:3 | 0.5173 (0.1545)  | 0.4228 (0.1179)  | <b>5.00E-06***</b> | <b>7.58E-06***</b> | -1.22 | -18.27 |
| 83  | PC aa C40:4 | 2.6076 (0.6890)  | 2.2108 (0.6987)  | <b>5.39E-08***</b> | <b>1.11E-07***</b> | -1.18 | -15.22 |
| 84  | PC aa C40:5 | 8.9807 (2.5309)  | 7.3330 (2.5341)  | <b>4.89E-09***</b> | <b>1.16E-08***</b> | -1.22 | -18.35 |
| 85  | PC aa C40:6 | 22.174 (6.204)   | 17.888 (5.327)   | <b>2.90E-09***</b> | <b>7.41E-09***</b> | -1.24 | -19.33 |
| 86  | PC aa C42:0 | 0.4497 (0.1404)  | 0.3732 (0.1264)  | <b>8.52E-08***</b> | <b>1.68E-07***</b> | -1.20 | -17.01 |
| 87  | PC aa C42:1 | 0.2218 (0.0659)  | 0.1732 (0.0563)  | <b>8.86E-08***</b> | <b>1.72E-07***</b> | -1.28 | -21.90 |
| 88  | PC aa C42:2 | 0.1877 (0.0535)  | 0.1635 (0.0548)  | <b>4.00E-05***</b> | <b>5.69E-05***</b> | -1.15 | -12.90 |
| 89  | PC aa C42:4 | 0.1863 (0.0465)  | 0.1591 (0.0609)  | <b>0.0008***</b>   | <b>0.0011***</b>   | -1.17 | -14.62 |
| 90  | PC aa C42:5 | 0.3007 (0.0864)  | 0.2488 (0.0770)  | <b>1.73E-09***</b> | <b>4.86E-09***</b> | -1.21 | -17.26 |
| 91  | PC aa C42:6 | 0.4673 (0.1052)  | 0.4003 (0.0891)  | <b>9.96E-07***</b> | <b>1.59E-06***</b> | -1.17 | -14.34 |
| 92  | PC ae C30:0 | 0.3082 (0.1038)  | 0.2575 (0.0715)  | <b>6.00E-06***</b> | <b>8.90E-06***</b> | -1.20 | -16.45 |
| 93  | PC ae C30:1 | 0.5427 (0.1625)  | 0.4431 (0.1246)  | <b>0.0016***</b>   | <b>0.0020***</b>   | -1.22 | -18.36 |
| 94  | PC ae C30:2 | 0.1253 (0.0468)  | 0.1151 (0.0405)  | 0.7966             | 0.8302             | -1.09 | -8.20  |
| 95  | PC ae C32:1 | 2.3387 (0.5896)  | 1.8496 (0.4862)  | <b>6.96E-12***</b> | <b>3.84E-11***</b> | -1.26 | -20.91 |
| 96  | PC ae C32:2 | 0.4687 (0.1397)  | 0.3865 (0.1118)  | <b>3.47E-08***</b> | <b>7.26E-08***</b> | -1.21 | -17.54 |
| 97  | PC ae C34:0 | 1.2672 (0.3981)  | 0.9775 (0.2787)  | <b>3.76E-12***</b> | <b>2.16E-11***</b> | -1.30 | -22.86 |
| 98  | PC ae C34:1 | 7.5220 (2.0333)  | 6.1437 (1.5489)  | <b>1.14E-08***</b> | <b>2.58E-08***</b> | -1.22 | -18.32 |
| 99  | PC ae C34:2 | 7.0252 (2.0493)  | 5.6174 (1.5967)  | <b>4.64E-11***</b> | <b>2.21E-10***</b> | -1.25 | -20.04 |
| 100 | PC ae C34:3 | 4.6626 (1.5911)  | 3.5776 (1.2430)  | <b>5.19E-15***</b> | <b>5.97E-14***</b> | -1.30 | -23.27 |
| 101 | PC ae C36:0 | 0.7013 (0.2164)  | 0.6013 (0.1668)  | <b>6.00E-06***</b> | <b>8.90E-06***</b> | -1.17 | -14.26 |
| 102 | PC ae C36:1 | 9.7619 (2.5709)  | 8.2839 (2.2357)  | <b>3.57E-13***</b> | <b>2.59E-12***</b> | -1.18 | -15.14 |
| 103 | PC ae C36:2 | 9.7348 (2.5577)  | 8.1306 (2.1256)  | <b>8.73E-11***</b> | <b>4.02E-10***</b> | -1.20 | -16.48 |
| 104 | PC ae C36:3 | 4.6719 (1.1745)  | 3.7483 (1.0496)  | <b>1.46E-08***</b> | <b>3.20E-08***</b> | -1.25 | -19.77 |
| 105 | PC ae C36:4 | 9.6913 (2.4438)  | 7.7763 (2.0533)  | <b>7.39E-09***</b> | <b>1.70E-08***</b> | -1.25 | -19.76 |
| 106 | PC ae C36:5 | 7.9494 (2.4445)  | 6.2626 (2.0832)  | <b>2.34E-15***</b> | <b>3.80E-14***</b> | -1.27 | -21.22 |
| 107 | PC ae C38:0 | 0.9891 (0.2971)  | 0.8423 (0.2556)  | <b>2.21E-13***</b> | <b>1.79E-12***</b> | -1.17 | -14.84 |
| 108 | PC ae C38:1 | 3.9581 (0.9142)  | 3.3457 (0.8086)  | <b>9.26E-07***</b> | <b>1.52E-06***</b> | -1.18 | -15.47 |
| 109 | PC ae C38:2 | 3.6572 (0.8789)  | 3.0622 (0.7337)  | <b>1.00E-06***</b> | <b>1.59E-06***</b> | -1.19 | -16.27 |
| 110 | PC ae C38:3 | 4.4846 (1.0367)  | 3.7607 (0.9841)  | <b>3.55E-10***</b> | <b>1.22E-09***</b> | -1.19 | -16.14 |
| 111 | PC ae C38:4 | 8.9002 (2.0139)  | 7.4854 (1.8538)  | <b>1.41E-09***</b> | <b>4.14E-09***</b> | -1.19 | -15.90 |
| 112 | PC ae C38:5 | 11.1281 (2.8446) | 9.0276 (2.2733)  | <b>1.43E-08***</b> | <b>3.18E-08***</b> | -1.23 | -18.88 |
| 113 | PC ae C38:6 | 4.9241 (1.3637)  | 3.9028 (1.0751)  | <b>1.21E-13***</b> | <b>1.11E-12***</b> | -1.26 | -20.74 |
| 114 | PC ae C40:1 | 0.8925 (0.2176)  | 0.7605 (0.1954)  | <b>5.55E-09***</b> | <b>1.30E-08***</b> | -1.17 | -14.80 |
| 115 | PC ae C40:2 | 1.7549 (0.5110)  | 1.4575 (0.3972)  | <b>2.32E-07***</b> | <b>4.16E-07***</b> | -1.20 | -16.95 |
| 116 | PC ae C40:3 | 1.1284 (0.2785)  | 0.9608 (0.2545)  | <b>2.20E-05***</b> | <b>3.16E-05***</b> | -1.17 | -14.86 |
| 117 | PC ae C40:4 | 1.6789 (0.3500)  | 1.4160 (0.3399)  | <b>2.00E-06***</b> | <b>3.14E-06***</b> | -1.19 | -15.66 |

|     |               |                  |                   |                    |                    |       |        |
|-----|---------------|------------------|-------------------|--------------------|--------------------|-------|--------|
| 118 | PC ae C40:5   | 2.7935 (0.6303)  | 2.3604 (0.5687)   | <b>6.54E-08***</b> | <b>1.31E-07***</b> | -1.18 | -15.51 |
| 119 | PC ae C40:6   | 3.4591 (0.8866)  | 2.9048 (0.7314)   | <b>1.45E-10***</b> | <b>6.06E-10***</b> | -1.19 | -16.02 |
| 120 | PC ae C42:1   | 0.2166 (0.0532)  | 0.1994 (0.0582)   | <b>0.0237*</b>     | <b>0.0272*</b>     | -1.09 | -7.92  |
| 121 | PC ae C42:2   | 0.3601 (0.0865)  | 0.3160 (0.0869)   | <b>0.0002***</b>   | <b>0.0003***</b>   | -1.14 | -12.25 |
| 122 | PC ae C42:3   | 0.5059 (0.1380)  | 0.4256 (0.1240)   | <b>1.40E-05***</b> | <b>2.06E-05***</b> | -1.19 | -15.87 |
| 123 | PC ae C42:4   | 0.6408 (0.1778)  | 0.5402 (0.1684)   | <b>4.00E-06***</b> | <b>6.13E-06***</b> | -1.19 | -15.71 |
| 124 | PC ae C42:5   | 1.5347 (0.3955)  | 1.3116 (0.3392)   | <b>1.27E-07***</b> | <b>2.40E-07***</b> | -1.17 | -14.54 |
| 125 | PC ae C44:3   | 0.0904 (0.0208)  | 0.0769 (0.0278)   | <b>0.0017**</b>    | <b>0.0021**</b>    | -1.18 | -14.99 |
| 126 | PC ae C44:4   | 0.3046 (0.0829)  | 0.2649 (0.0888)   | <b>0.0003***</b>   | <b>0.0004***</b>   | -1.15 | -13.06 |
| 127 | PC ae C44:5   | 1.4199 (0.4280)  | 1.1809 (0.3625)   | <b>9.61E-07***</b> | <b>1.56E-06***</b> | -1.20 | -16.83 |
| 128 | PC ae C44:6   | 1.0951 (0.3276)  | 0.8649 (0.2605)   | <b>4.94E-10***</b> | <b>1.55E-09***</b> | -1.27 | -21.02 |
| 129 | SM (OH) C14:1 | 3.2228 (0.8208)  | 2.4913 (0.7180)   | <b>1.81E-10***</b> | <b>7.35E-10***</b> | -1.29 | -22.70 |
| 130 | SM (OH) C16:1 | 1.8613 (0.4953)  | 1.4075 (0.4255)   | <b>4.68E-10***</b> | <b>1.54E-09***</b> | -1.32 | -24.38 |
| 131 | SM (OH) C22:1 | 2.9569 (1.6729)  | 1.8487 (1.1700)   | <b>1.68E-07***</b> | <b>3.05E-07***</b> | -1.60 | -37.48 |
| 132 | SM (OH) C22:2 | 5.6330 (2.2108)  | 3.7696 (1.5519)   | <b>4.83E-07***</b> | <b>8.13E-07***</b> | -1.49 | -33.08 |
| 133 | SM C16:0      | 57.165 (13.475)  | 43.587 (10.615)   | <b>1.62E-13***</b> | <b>1.40E-12***</b> | -1.31 | -23.75 |
| 134 | SM C16:1      | 8.3546 (2.1450)  | 6.2833 (1.5783)   | <b>1.00E-17***</b> | <b>4.60E-16***</b> | -1.33 | -24.79 |
| 135 | SM C18:0      | 15.101 (3.566)   | 11.621 (3.073)    | <b>2.48E-15***</b> | <b>3.80E-14***</b> | -1.30 | -23.05 |
| 136 | SM C18:1      | 6.1657 (1.5907)  | 4.7296 (1.2667)   | <b>3.01E-15***</b> | <b>4.15E-14***</b> | -1.30 | -23.29 |
| 137 | SM C24:0      | 10.2911 (2.2144) | 7.9402 (1.8936)   | <b>2.99E-13***</b> | <b>2.29E-12***</b> | -1.30 | -22.84 |
| 138 | H1            | 5446.69 (829.25) | 5889.78 (1298.04) | <b>0.0025**</b>    | <b>0.0032**</b>    | 1.08  | 8.14   |

Significant *p*-values are shown in bold. \**p* < 0.05, \*\**p* < 0.01, \*\*\* *p* < 0.001 pre-op vs post-op. *q*-values are from Benjamini-Hochberg. Significant *q*-values are shown in bold. \**q* < 0.05, \*\**q* < 0.01, \*\*\* *q* < 0.001 pre-op vs post-op. Pre-op: pre-operative; Post-op: post-operative; SD: standard deviation; Ala: alanine; Arg: arginine; Asn: asparagine; Asp: aspartate; Cit: citrulline ; Gln: glutamine; Glu: glutamate; Gly: glycine; His: histidine; Ile: isoleucine; Leu: leucine; Lys: lysine; Met: methionine; Orn: ornithine; Phe: phenylalanine; Pro: proline; Ser: serine; Thr: threonine; Trp: tryptophan; Tyr: tyrosine; Val: valine; ADMA: asymmetric dimethylarginine; SDMA:symmetric dimethylarginine; H1: hexose.

**Supplementary Table S3.** Univariate analysis of all the metabolites between pre and post-op with control and delirium.

| No. | Name    | Pre-Ctrl     | Pre-Del      | Post-Ctrl    | Post-Del     | <i>p</i> -Value    | <i>q</i> -Value | post-hoc test                                            | % Ctrl | % Del  |
|-----|---------|--------------|--------------|--------------|--------------|--------------------|-----------------|----------------------------------------------------------|--------|--------|
|     |         | Mean (SD)    | Mean (SD)    | Mean (SD)    | Mean (SD)    |                    |                 |                                                          |        |        |
| 1   | C0      | 37.93(8.30)  | 36.36(7.49)  | 36.19(8.64)  | 33.63(7.90)  | 0.270              | 0.308           | -                                                        | -4.59  | -7.52  |
| 2   | C14:1   | 0.258(0.069) | 0.252(0.071) | 0.215(0.072) | 0.228(0.066) | 0.083              | 0.107           | -                                                        | -16.79 | -9.63  |
| 3   | C14:2   | 0.045(0.023) | 0.040(0.020) | 0.039(0.012) | 0.039(0.014) | 0.583              | 0.610           | -                                                        | -14.10 | -2.51  |
| 4   | C16     | 0.134(0.035) | 0.118(0.035) | 0.102(0.026) | 0.096(0.031) | <b>2.51E-04***</b> | <b>0.002**</b>  | pre-ctrl-post-ctrl; pre-ctrl-post-del                    | -23.75 | -18.38 |
| 5   | C16:1   | 0.041(0.016) | 0.042(0.022) | 0.033(0.012) | 0.037(0.015) | 0.370              | 0.408           | -                                                        | -19.51 | -11.81 |
| 6   | C18     | 0.040(0.013) | 0.037(0.015) | 0.036(0.012) | 0.029(0.015) | <b>0.037*</b>      | 0.051           | pre-ctrl-post-del                                        | -10.10 | -21.04 |
| 7   | C18:1   | 0.172(0.038) | 0.168(0.065) | 0.129(0.026) | 0.137(0.043) | <b>0.001**</b>     | <b>0.004**</b>  | pre-ctrl-post-ctrl; pre-ctrl-post-del; pre-del-post-ctrl | -24.96 | -18.66 |
| 8   | C2      | 8.810(3.605) | 8.076(3.614) | 7.520(2.756) | 6.165(2.262) | <b>0.015*</b>      | <b>0.025*</b>   | pre-ctrl-post-del                                        | -14.65 | -23.67 |
| 9   | C3      | 0.208(0.080) | 0.241(0.097) | 0.191(0.076) | 0.201(0.083) | 0.232              | 0.267           | -                                                        | -7.94  | -16.79 |
| 10  | C5      | 0.110(0.046) | 0.117(0.053) | 0.110(0.035) | 0.115(0.055) | 0.974              | 0.988           | -                                                        | -0.18  | -2.47  |
| 11  | C5:1-DC | 0.019(0.012) | 0.022(0.012) | 0.016(0.009) | 0.027(0.026) | 0.388              | 0.425           | -                                                        | -15.46 | 25.46  |

|    |            |                 |                 |                 |                |                    |                    |                                                                            |        |        |
|----|------------|-----------------|-----------------|-----------------|----------------|--------------------|--------------------|----------------------------------------------------------------------------|--------|--------|
| 12 | C7-DC      | 0.030(0.012)    | 0.023(0.011)    | 0.026(0.013)    | 0.019(0.009)   | <b>0.012*</b>      | <b>0.021*</b>      | pre-ctrl-post-del                                                          | -11.86 | -17.95 |
| 13 | Ala        | 346.35(75.14)   | 333.82(88.97)   | 298.73(81.47)   | 319.04(93.28)  | 0.216              | 0.250              | -                                                                          | -13.75 | -4.43  |
| 14 | Arg        | 84.14(15.79)    | 80.87(16.94)    | 79.86(16.95)    | 78.44(17.96)   | 0.653              | 0.672              | -                                                                          | -5.08  | -3.01  |
| 15 | Asn        | 37.65(6.34)     | 38.05(6.91)     | 32.95(6.70)     | 33.46(6.15)    | <b>0.005**</b>     | <b>0.011*</b>      | pre-del-post-ctrl; pre-del-post-del                                        | -12.49 | -12.06 |
| 16 | Asp        | 4.054(2.996)    | 3.853(1.153)    | 3.971(1.330)    | 4.634(2.624)   | 0.201              | 0.239              | -                                                                          | -2.06  | 20.28  |
| 17 | Cit        | 33.10(7.11)     | 34.70(8.64)     | 31.26(6.82)     | 31.58(7.77)    | 0.324              | 0.364              | -                                                                          | -5.57  | -9.00  |
| 18 | Gln        | 715.85(67.58)   | 738.86(91.40)   | 692.19(108.99)  | 686.39(112.14) | 0.172              | 0.210              | -                                                                          | -3.30  | -7.10  |
| 19 | Glu        | 42.04(19.64)    | 41.70(17.35)    | 47.13(22.32)    | 48.19(21.69)   | 0.548              | 0.582              | -                                                                          | 12.10  | 15.57  |
| 20 | Gly        | 198.88(57.76)   | 235.04(96.88)   | 173.23(49.54)   | 199.61(79.10)  | <b>0.035*</b>      | <b>0.049*</b>      | pre-del-post-ctrl                                                          | -12.90 | -15.07 |
| 21 | His        | 72.48(6.81)     | 70.98(9.39)     | 71.86(9.75)     | 68.26(9.83)    | 0.487              | 0.525              | -                                                                          | -0.85  | -3.83  |
| 22 | Ile        | 68.73(14.73)    | 67.45(13.25)    | 66.36(13.36)    | 63.77(16.870)  | 0.589              | 0.611              | -                                                                          | -3.44  | -5.46  |
| 23 | Leu        | 138.123(35.725) | 134.018(32.996) | 124.665(23.726) | 116.064(30.81) | <b>0.028*</b>      | <b>0.042*</b>      | pre-ctrl-post-del                                                          | -9.74  | -13.40 |
| 24 | Lys        | 159.50(23.23)   | 174.11(25.84)   | 152.65(25.22)   | 165.15(29.65)  | <b>0.025*</b>      | <b>0.039*</b>      | pre-del-post-ctrl                                                          | -4.29  | -5.14  |
| 25 | Met        | 20.71(2.89)     | 21.21(3.78)     | 19.19(3.48)     | 19.61(4.05)    | 0.142              | 0.175              | -                                                                          | -7.35  | -7.53  |
| 26 | Orn        | 47.69(12.24)    | 56.10(13.33)    | 40.98(9.45)     | 47.57(10.15)   | <b>7.80E-05***</b> | <b>0.001**</b>     | pre-ctrl-pre-del; pre-del-post-ctrl; pre-del-post-del                      | -14.06 | -15.21 |
| 27 | Phe        | 59.79(8.65)     | 58.30(10.38)    | 52.89(9.15)     | 51.38(11.73)   | <b>0.006**</b>     | <b>0.013*</b>      | pre-ctrl-post-del                                                          | -11.54 | -11.88 |
| 28 | Pro        | 177.73(32.94)   | 197.57(35.97)   | 162.50(25.75)   | 175.18(36.44)  | <b>0.002**</b>     | <b>0.006**</b>     | pre-del-post-ctrl                                                          | -8.57  | -11.33 |
| 29 | Ser        | 83.83(17.05)    | 88.20(20.43)    | 76.03(16.15)    | 80.74(18.85)   | 0.102              | 0.129              | -                                                                          | -9.30  | -8.45  |
| 30 | Thr        | 86.87(19.11)    | 98.60(23.89)    | 76.72(18.65)    | 89.29(25.11)   | <b>0.005**</b>     | <b>0.011*</b>      | pre-del-post-ctrl                                                          | -11.68 | -9.44  |
| 31 | Trp        | 46.29(10.15)    | 48.75(10.24)    | 30.08(7.90)     | 30.95(7.67)    | <b>8.76E-15***</b> | <b>1.21E-12***</b> | pre-ctrl-post-ctrl; pre-ctrl-post-del; pre-del-post-ctrl; pre-del-post-del | -35.03 | -36.52 |
| 32 | Tyr        | 53.97(14.02)    | 56.50(12.82)    | 47.94(12.14)    | 48.71(10.32)   | <b>0.032*</b>      | <b>0.047*</b>      | -                                                                          | -11.16 | -13.79 |
| 33 | Val        | 194.31(28.09)   | 197.32(39.93)   | 183.77(30.40)   | 179.04(42.32)  | 0.197              | 0.238              | -                                                                          | -5.42  | -9.27  |
| 34 | ADMA       | 0.444(0.229)    | 0.389(0.178)    | 0.374(0.148)    | 0.424(0.137)   | 0.469              | 0.510              | -                                                                          | -15.74 | 8.89   |
| 35 | Creatinine | 70.08(29.65)    | 63.15(22.37)    | 62.71(19.07)    | 55.18(18.31)   | 0.207              | 0.242              | -                                                                          | -10.52 | -12.61 |
| 36 | Kynurenine | 2.634(0.687)    | 2.821(0.699)    | 2.245(0.463)    | 2.311(0.564)   | <b>0.003**</b>     | <b>0.008**</b>     | pre-del-post-ctrl; pre-del-post-del                                        | -14.78 | -18.06 |
| 37 | Met-SO     | 0.987(0.394)    | 0.937(0.408)    | 0.727(0.436)    | 0.509(0.330)   | <b>1.74E-04***</b> | <b>0.001**</b>     | pre-ctrl-post-del; pre-del-post-del                                        | -26.33 | -45.72 |

|    |                |              |               |              |              |                    |                    |                                                                            |        |        |
|----|----------------|--------------|---------------|--------------|--------------|--------------------|--------------------|----------------------------------------------------------------------------|--------|--------|
| 38 | Putrescine     | 0.107(0.040) | 0.113(0.042)  | 0.120(0.042) | 0.135(0.053) | 0.131              | 0.163              | -                                                                          | 12.95  | 19.95  |
| 39 | Sarcosine      | 0.924(0.421) | 1.053(0.361)  | 0.885(0.318) | 1.155(0.303) | <b>0.018*</b>      | <b>0.029*</b>      | pre-ctrl-post-del                                                          | -4.25  | 9.75   |
| 40 | Serotonin      | 0.101(0.104) | 0.091(0.081)  | 0.103(0.113) | 0.094(0.102) | 0.994              | 0.994              | -                                                                          | 1.49   | 3.07   |
| 41 | Spermidine     | 0.162(0.099) | 0.163(0.086)  | 0.149(0.036) | 0.161(0.036) | 0.088              | 0.112              | -                                                                          | -8.39  | -1.16  |
| 42 | Spermine       | 0.183(0.041) | 0.187(0.025)  | 0.189(0.038) | 0.211(0.033) | <b>0.009**</b>     | <b>0.017*</b>      | pre-ctrl-post-del; post-ctrl-post-del                                      | 2.78   | 13.01  |
| 43 | t4-OH-Pro      | 9.224(3.056) | 10.273(4.410) | 7.814(2.070) | 8.253(2.882) | <b>0.039*</b>      | 0.053              | -                                                                          | -15.28 | -19.66 |
| 44 | Taurine        | 56.74(14.01) | 54.79(11.79)  | 52.20(12.34) | 52.25(15.49) | 0.553              | 0.583              | -                                                                          | -8.00  | -4.65  |
| 45 | SDMA           | 0.695(0.492) | 0.557(0.285)  | 0.572(0.229) | 0.652(0.245) | 0.520              | 0.556              | -                                                                          | -17.65 | 16.88  |
| 46 | lysoPC a C16:0 | 71.70(17.61) | 69.09(17.11)  | 54.15(14.98) | 52.80(14.26) | <b>7.00E-06***</b> | <b>1.61E-04***</b> | pre-ctrl-post-ctrl; pre-ctrl-post-del; pre-del-post-ctrl; pre-del-post-del | -24.47 | -23.57 |
| 47 | lysoPC a C16:1 | 2.477(0.551) | 2.495(0.763)  | 1.961(0.545) | 1.984(0.640) | <b>0.001**</b>     | <b>0.004**</b>     | pre-ctrl-post-ctrl; pre-ctrl-post-del; pre-del-post-ctrl; pre-del-post-del | -20.83 | -20.48 |
| 48 | lysoPC a C17:0 | 1.427(0.464) | 1.485(0.498)  | 1.069(0.356) | 1.147(0.377) | <b>0.001**</b>     | <b>0.004**</b>     | pre-ctrl-post-ctrl; pre-del-post-ctrl; pre-del-post-del                    | -25.11 | -22.79 |
| 49 | lysoPC a C18:0 | 19.66(6.48)  | 18.63(4.95)   | 14.34(5.41)  | 13.99(3.76)  | <b>2.20E-05***</b> | <b>2.89E-04***</b> | pre-ctrl-post-ctrl; pre-ctrl-post-del; pre-del-post-ctrl; pre-del-post-del | -27.03 | -24.90 |
| 50 | lysoPC a C18:1 | 16.49(3.94)  | 17.14(4.42)   | 13.50(3.45)  | 13.54(4.18)  | <b>0.001**</b>     | <b>0.004**</b>     | pre-ctrl-post-ctrl; pre-ctrl-post-del; pre-del-post-ctrl; pre-del-post-del | -18.13 | -21.03 |
| 51 | lysoPC a C18:2 | 20.72(5.55)  | 20.37(5.99)   | 16.09(4.71)  | 15.55(4.67)  | <b>1.66E-04***</b> | <b>0.001**</b>     | pre-ctrl-post-ctrl; pre-ctrl-post-del; pre-del-post-ctrl; pre-del-post-del | -22.35 | -23.65 |
| 52 | lysoPC a C20:3 | 2.308(0.600) | 2.198(0.524)  | 1.790(0.595) | 1.745(0.527) | <b>1.96E-04***</b> | <b>0.001**</b>     | pre-ctrl-post-ctrl; pre-ctrl-post-del; pre-del-post-ctrl;                  | -22.42 | -20.61 |

|    |                   |               |               |               |               |                    |                | pre-del-post-del                                                           |        |        |
|----|-------------------|---------------|---------------|---------------|---------------|--------------------|----------------|----------------------------------------------------------------------------|--------|--------|
| 53 | lysoPC a<br>C20:4 | 5.290(1.850)  | 5.307(1.552)  | 4.126(1.660)  | 4.165(1.535)  | <b>0.002**</b>     | <b>0.007**</b> | pre-del-post-ctrl; pre-del-post-del                                        | -22.01 | -21.51 |
| 54 | lysoPC a<br>C24:0 | 0.275(0.139)  | 0.300(0.129)  | 0.293(0.140)  | 0.263(0.171)  | 0.779              | 0.796          | -                                                                          | 6.40   | -12.15 |
| 55 | lysoPC a<br>C26:0 | 0.282(0.138)  | 0.458(0.295)  | 0.421(0.269)  | 0.433(0.251)  | 0.067              | 0.087          | -                                                                          | 49.29  | -5.48  |
| 56 | lysoPC a<br>C26:1 | 0.293(0.097)  | 0.338(0.217)  | 0.307(0.162)  | 0.355(0.250)  | 0.982              | 0.989          | -                                                                          | 4.99   | 5.06   |
| 57 | lysoPC a<br>C28:0 | 0.382(0.117)  | 0.466(0.240)  | 0.432(0.196)  | 0.466(0.178)  | 0.329              | 0.366          | -                                                                          | 13.00  | -0.09  |
| 58 | lysoPC a<br>C28:1 | 0.564(0.164)  | 0.746(0.347)  | 0.595(0.230)  | 0.667(0.301)  | 0.198              | 0.238          | -                                                                          | 5.63   | -10.56 |
| 59 | PC aa<br>C24:0    | 0.117(0.056)  | 0.179(0.111)  | 0.165(0.082)  | 0.182(0.094)  | <b>0.032*</b>      | <b>0.047*</b>  | pre-ctrl-post-del;                                                         | 40.63  | 2.18   |
| 60 | PC aa<br>C28:1    | 2.084(0.582)  | 2.050(0.528)  | 1.639(0.473)  | 1.641(0.462)  | <b>0.001**</b>     | <b>0.004**</b> | pre-ctrl-post-ctrl; pre-ctrl-post-del; pre-del-post-ctrl; pre-del-post-del | -21.35 | -19.96 |
| 61 | PC aa<br>C30:0    | 3.192(0.971)  | 3.162(0.889)  | 2.404(0.751)  | 2.413(0.622)  | <b>8.10E-05***</b> | <b>0.001**</b> | pre-ctrl-post-ctrl; pre-ctrl-post-del; pre-del-post-ctrl; pre-del-post-del | -24.67 | -23.69 |
| 62 | PC aa<br>C32:0    | 10.20(2.89)   | 10.48(2.81)   | 8.00(2.48)    | 8.41(2.03)    | <b>3.77E-04***</b> | <b>0.002**</b> | pre-ctrl-post-ctrl; pre-del-post-ctrl; pre-del-post-del                    | -21.58 | -19.75 |
| 63 | PC aa<br>C32:1    | 17.22(7.42)   | 15.89(5.72)   | 13.81(6.22)   | 13.06(4.44)   | 0.052              | 0.070          | -                                                                          | -19.82 | -17.81 |
| 64 | PC aa<br>C32:3    | 0.267(0.069)  | 0.269(0.060)  | 0.215(0.063)  | 0.210(0.052)  | <b>1.55E-04***</b> | <b>0.001**</b> | pre-ctrl-post-ctrl; pre-ctrl-post-del; pre-del-post-ctrl; pre-del-post-del | -19.39 | -21.85 |
| 65 | PC aa<br>C34:1    | 224.08(56.52) | 217.50(59.13) | 186.15(52.63) | 183.24(49.23) | <b>0.010*</b>      | <b>0.018*</b>  | pre-ctrl-post-del                                                          | -16.92 | -15.75 |
| 66 | PC aa<br>C34:2    | 332.15(99.46) | 296.07(60.02) | 262.92(83.49) | 239.64(52.23) | <b>1.15E-04***</b> | <b>0.001**</b> | pre-ctrl-post-ctrl; pre-ctrl-post-del; pre-del-post-del                    | -20.85 | -19.06 |
| 67 | PC aa<br>C34:3    | 12.91(4.01)   | 11.87(2.86)   | 10.27(3.36)   | 9.62(2.35)    | <b>0.001**</b>     | <b>0.004**</b> | pre-ctrl-post-ctrl; pre-ctrl-post-del; pre-del-post-del                    | -20.42 | -18.94 |

|    |                |                   |                   |               |                    |                    |                    |                                                                            |        |        |
|----|----------------|-------------------|-------------------|---------------|--------------------|--------------------|--------------------|----------------------------------------------------------------------------|--------|--------|
| 68 | PC aa<br>C34:4 | 1.133(0.429)      | 1.048(0.313)      | 0.887(0.381)  | 0.830(0.231)       | <b>0.004**</b>     | <b>0.009**</b>     | pre-ctrl-post-del                                                          | -21.77 | -20.82 |
| 69 | PC aa<br>C36:0 | 2.780(1.074)      | 2.714(0.825)      | 2.372(0.852)  | 2.456(0.831)       | 0.283              | 0.320              | -                                                                          | -14.67 | -9.53  |
| 70 | PC aa<br>C36:1 | 38.59(9.99)       | 39.17(12.24)      | 32.11(9.47)   | 31.95(9.27)        | <b>0.009**</b>     | <b>0.017*</b>      | pre-ctrl-post-del                                                          | -16.79 | -18.43 |
| 71 | PC aa<br>C36:2 | 178.96(46.17<br>) | 167.83(29.81<br>) | 140.32(40.31) | 132.19(24.71)      | <b>6.00E-06***</b> | <b>1.61E-04***</b> | pre-ctrl-post-ctrl; pre-ctrl-post-del; pre-del-post-ctrl; pre-del-post-del | -21.59 | -21.23 |
| 72 | PC aa<br>C36:3 | 108.20(29.04<br>) | 101.21(18.72<br>) | 85.00(24.12)  | 80.27(17.95)       | <b>2.20E-05***</b> | <b>2.89E-04***</b> | pre-ctrl-post-ctrl; pre-ctrl-post-del; pre-del-post-ctrl; pre-del-post-del | -21.44 | -20.69 |
| 73 | PC aa<br>C36:4 | 171.04(56.17<br>) | 163.76(42.82<br>) | 135.07(46.61) | 132.09(39.21)      | <b>0.003**</b>     | <b>0.008**</b>     | pre-ctrl-post-ctrl; pre-del-post-ctrl                                      | -21.03 | -19.34 |
| 74 | PC aa<br>C36:5 | 22.50(8.43)       | 21.76(8.57)       | 18.07(7.37)   | 17.45(6.58)        | <b>0.037*</b>      | 0.051              | -                                                                          | -19.69 | -19.93 |
| 75 | PC aa<br>C36:6 | 0.625(0.209)      | 0.606(0.192)      | 0.501(0.203)  | 0.476(0.153)       | <b>0.008**</b>     | <b>0.015*</b>      | pre-ctrl-post-del                                                          | -19.90 | -21.43 |
| 76 | PC aa<br>C38:0 | 2.357(0.653)      | 2.281(0.627)      | 1.791(0.467)  | 1.856(0.515)       | <b>0.001**</b>     | <b>0.004**</b>     | pre-ctrl-post-ctrl; pre-ctrl-post-del; pre-del-post-ctrl                   | -23.99 | -18.60 |
| 77 | PC aa<br>C38:3 | 43.17(12.70)      | 39.98(8.68)       | 34.00(10.95)  | 32.39(9.02)        | <b>0.001**</b>     | <b>0.004**</b>     | pre-ctrl-post-ctrl; pre-ctrl-post-del; pre-del-post-del                    | -21.22 | -18.99 |
| 78 | PC aa<br>C38:4 | 90.27(29.84)      | 86.75(24.43)      | 73.05(27.61)  | 71.55(22.23)       | <b>0.010*</b>      | <b>0.018*</b>      | -                                                                          | -19.08 | -17.53 |
| 79 | PC aa<br>C38:5 | 46.83(13.20)      | 45.29(12.38)      | 37.46(12.37)  | 36.982(10.848<br>) | <b>0.005**</b>     | <b>0.011*</b>      | pre-ctrl-post-ctrl                                                         | -20.01 | -18.35 |
| 80 | PC aa<br>C38:6 | 65.91(18.28)      | 61.46(16.07)      | 52.62(14.72)  | 51.18(14.41)       | <b>0.002***</b>    | <b>0.007***</b>    | pre-ctrl-post-ctrl; pre-ctrl-post-del                                      | -20.17 | -16.73 |
| 81 | PC aa<br>C40:2 | 0.465(0.101)      | 0.492(0.141)      | 0.405(0.119)  | 0.425(0.119)       | <b>0.010*</b>      | <b>0.018*</b>      | pre-del-post-ctrl                                                          | -12.81 | -13.60 |
| 82 | PC aa<br>C40:3 | 0.491(0.125)      | 0.542(0.176)      | 0.393(0.113)  | 0.450(0.118)       | <b>0.001**</b>     | <b>0.004**</b>     | pre-del-post-ctrl                                                          | -19.88 | -16.92 |
| 83 | PC aa<br>C40:4 | 2.652(0.677)      | 2.566(0.710)      | 2.225(0.752)  | 2.198(0.659)       | <b>0.035*</b>      | <b>0.049*</b>      | -                                                                          | -16.11 | -14.36 |
| 84 | PC aa<br>C40:5 | 9.338(2.706)      | 8.649(2.357)      | 7.470(2.814)  | 7.206(2.288)       | <b>0.004**</b>     | <b>0.010*</b>      | pre-ctrl-post-ctrl; pre-ctrl-post-del                                      | -20.01 | -16.69 |
| 85 | PC aa<br>C40:6 | 22.60(6.69)       | 21.78(5.81)       | 17.88(5.52)   | 17.90(5.25)        | <b>0.002**</b>     | <b>0.006**</b>     | pre-ctrl-post-ctrl; pre-ctrl-                                              | -20.91 | -17.81 |



|     |                |              |               |              |              |                    |                | post-del; pre-del-post-ctrl                                                |        |        |
|-----|----------------|--------------|---------------|--------------|--------------|--------------------|----------------|----------------------------------------------------------------------------|--------|--------|
| 86  | PC aa<br>C42:0 | 0.456(0.146) | 0.444(0.137)  | 0.369(0.109) | 0.378(0.143) | <b>0.022*</b>      | <b>0.035*</b>  | -                                                                          | -19.21 | -14.92 |
| 87  | PC aa<br>C42:1 | 0.225(0.068) | 0.219(0.065)  | 0.175(0.053) | 0.172(0.060) | <b>0.001**</b>     | <b>0.004**</b> | pre-ctrl-post-ctrl; pre-ctrl-post-del; pre-del-post-del                    | -22.21 | -21.62 |
| 88  | PC aa<br>C42:2 | 0.191(0.062) | 0.185(0.045)  | 0.157(0.065) | 0.169(0.043) | <b>0.016*</b>      | <b>0.026*</b>  | pre-ctrl-post-ctrl; pre-del-post-ctrl                                      | -17.47 | -8.54  |
| 89  | PC aa<br>C42:4 | 0.180(0.045) | 0.192(0.048)  | 0.166(0.066) | 0.153(0.056) | <b>0.035*</b>      | <b>0.049*</b>  | -                                                                          | -7.79  | -20.58 |
| 90  | PC aa<br>C42:5 | 0.280(0.085) | 0.320(0.085)  | 0.247(0.079) | 0.250(0.076) | <b>0.004**</b>     | <b>0.010*</b>  | pre-del-post-ctrl; pre-del-post-del                                        | -11.68 | -21.79 |
| 91  | PC aa<br>C42:6 | 0.455(0.103) | 0.479(0.108)  | 0.401(0.086) | 0.400(0.093) | <b>0.005**</b>     | <b>0.011*</b>  | pre-del-post-ctrl; pre-del-post-del                                        | -11.89 | -16.49 |
| 92  | PC ae<br>C30:0 | 0.298(0.105) | 0.317(0.103)  | 0.259(0.086) | 0.256(0.057) | <b>0.043*</b>      | 0.058          | -                                                                          | -13.27 | -19.22 |
| 93  | PC ae<br>C30:1 | 0.522(0.140) | 0.562(0.181)  | 0.430(0.104) | 0.455(0.142) | <b>0.004**</b>     | <b>0.010*</b>  | pre-del-post-ctrl; pre-del-post-del                                        | -17.63 | -18.98 |
| 94  | PC ae<br>C30:2 | 0.110(0.032) | 0.139(0.054)  | 0.113(0.035) | 0.117(0.046) | 0.055              | 0.073          | -                                                                          | 2.72   | -16.21 |
| 95  | PC ae<br>C32:1 | 2.333(0.641) | 2.344(0.550)  | 1.844(0.559) | 1.855(0.418) | <b>1.85E-04***</b> | <b>0.001**</b> | pre-ctrl-post-ctrl; pre-ctrl-post-del; pre-del-post-ctrl; pre-del-post-del | -20.96 | -20.87 |
| 96  | PC ae<br>C32:2 | 0.451(0.141) | 0.486(0.139)  | 0.367(0.102) | 0.405(0.119) | <b>0.005**</b>     | <b>0.011*</b>  | pre-del-post-ctrl                                                          | -18.65 | -16.58 |
| 97  | PC ae<br>C34:0 | 1.227(0.357) | 1.305(0.436)  | 0.954(0.289) | 1.000(0.272) | <b>0.001**</b>     | <b>0.004**</b> | pre-ctrl-post-ctrl; pre-del-post-ctrl; pre-del-post-del                    | -22.23 | -23.40 |
| 98  | PC ae<br>C34:1 | 7.394(1.970) | 7.641(2.119)  | 5.927(1.387) | 6.345(1.685) | <b>0.002**</b>     | <b>0.006**</b> | pre-ctrl-post-ctrl; pre-del-post-ctrl; pre-del-post-del                    | -19.83 | -16.97 |
| 99  | PC ae<br>C34:2 | 7.223(2.352) | 6.841(1.746)  | 5.585(1.593) | 5.648(1.629) | <b>0.002**</b>     | <b>0.006**</b> | pre-ctrl-post-ctrl; pre-ctrl-post-del                                      | -22.68 | -17.45 |
| 100 | PC ae<br>C34:3 | 4.750(1.768) | 4.581(1.436)  | 3.551(1.218) | 3.603(1.288) | <b>0.003**</b>     | <b>0.008**</b> | pre-ctrl-post-del                                                          | -25.25 | -21.37 |
| 101 | PC ae<br>C36:0 | 0.739(0.228) | 0.666(0.203)  | 0.602(0.174) | 0.601(0.163) | <b>0.032*</b>      | <b>0.047*</b>  | pre-ctrl-post-del                                                          | -18.64 | -9.76  |
| 102 | PC ae<br>C36:1 | 9.473(2.362) | 10.030(2.766) | 7.882(1.948) | 8.657(2.449) | <b>0.009**</b>     | <b>0.017*</b>  | pre-del-post-ctrl                                                          | -16.80 | -13.69 |

|     |                |              |              |              |              |                    |                |                                                                            |        |        |
|-----|----------------|--------------|--------------|--------------|--------------|--------------------|----------------|----------------------------------------------------------------------------|--------|--------|
| 103 | PC ae<br>C36:2 | 9.617(2.613) | 9.844(2.548) | 7.868(2.046) | 8.375(2.206) | <b>0.007**</b>     | <b>0.014*</b>  | pre-del-post-ctrl                                                          | -18.19 | -14.93 |
| 104 | PC ae<br>C36:3 | 4.856(1.356) | 4.501(0.970) | 3.755(1.050) | 3.742(1.069) | <b>3.26E-04***</b> | <b>0.002**</b> | pre-ctrl-post-ctrl; pre-ctrl-post-del; pre-del-post-del                    | -22.66 | -16.87 |
| 105 | PC ae<br>C36:4 | 10.01(2.76)  | 9.40(2.12)   | 7.83(2.23)   | 7.73(1.91)   | <b>3.26E-04***</b> | <b>0.002**</b> | pre-ctrl-post-ctrl; pre-ctrl-post-del; pre-del-post-ctrl; pre-del-post-del | -21.80 | -17.74 |
| 106 | PC ae<br>C36:5 | 8.064(2.764) | 7.844(2.152) | 6.201(2.314) | 6.320(1.885) | <b>0.002**</b>     | <b>0.006**</b> | pre-ctrl-post-ctrl; pre-del-post-ctrl                                      | -23.10 | -19.42 |
| 107 | PC ae<br>C38:0 | 0.986(0.324) | 0.992(0.276) | 0.840(0.262) | 0.845(0.254) | 0.065              | 0.085          | -                                                                          | -14.83 | -14.84 |
| 108 | PC ae<br>C38:1 | 4.036(1.082) | 3.886(0.739) | 3.331(0.887) | 3.360(0.744) | <b>0.005**</b>     | <b>0.011*</b>  | pre-ctrl-post-ctrl; pre-ctrl-post-del;                                     | -17.48 | -13.54 |
| 109 | PC ae<br>C38:2 | 3.662(0.991) | 3.653(0.780) | 3.008(0.722) | 3.113(0.754) | <b>0.005**</b>     | <b>0.011*</b>  | pre-del-post-ctrl                                                          | -17.85 | -14.79 |
| 110 | PC ae<br>C38:3 | 4.556(1.079) | 4.419(1.011) | 3.670(0.878) | 3.845(1.083) | <b>0.004**</b>     | <b>0.010*</b>  | pre-ctrl-post-ctrl; pre-del-post-ctrl                                      | -19.44 | -12.98 |
| 111 | PC ae<br>C38:4 | 8.901(2.105) | 8.900(1.965) | 7.289(1.784) | 7.668(1.931) | <b>0.003**</b>     | <b>0.008**</b> | pre-ctrl-post-ctrl; pre-del-post-ctrl                                      | -18.11 | -13.84 |
| 112 | PC ae<br>C38:5 | 11.32(3.18)  | 10.95(2.54)  | 8.88(2.24)   | 9.17(2.33)   | <b>0.001**</b>     | <b>0.004**</b> | pre-ctrl-post-ctrl; pre-del-post-ctrl                                      | -21.63 | -16.23 |
| 113 | PC ae<br>C38:6 | 5.013(1.391) | 4.841(1.358) | 3.869(0.995) | 3.934(1.162) | <b>0.001**</b>     | <b>0.004**</b> | pre-ctrl-post-ctrl; pre-ctrl-post-del; pre-del-post-ctrl; pre-del-post-del | -22.83 | -18.74 |
| 114 | PC ae<br>C40:1 | 0.886(0.240) | 0.898(0.199) | 0.756(0.204) | 0.765(0.190) | <b>0.016*</b>      | <b>0.026*</b>  | -                                                                          | -14.72 | -14.85 |
| 115 | PC ae<br>C40:2 | 1.744(0.467) | 1.766(0.557) | 1.417(0.312) | 1.495(0.465) | <b>0.007**</b>     | <b>0.014*</b>  | pre-ctrl-post-ctrl                                                         | -18.72 | -15.32 |
| 116 | PC ae<br>C40:3 | 1.147(0.303) | 1.111(0.258) | 0.948(0.241) | 0.972(0.270) | <b>0.014*</b>      | <b>0.024*</b>  | -                                                                          | -17.31 | -12.49 |
| 117 | PC ae<br>C40:4 | 1.714(0.381) | 1.646(0.323) | 1.390(0.315) | 1.440(0.366) | <b>0.002**</b>     | <b>0.006**</b> | pre-ctrl-post-ctrl; pre-ctrl-post-del; pre-del-post-ctrl                   | -18.89 | -12.53 |
| 118 | PC ae<br>C40:5 | 2.832(0.618) | 2.758(0.650) | 2.307(0.511) | 2.410(0.623) | <b>0.004**</b>     | <b>0.010*</b>  | pre-ctrl-post-ctrl; pre-del-post-ctrl                                      | -18.51 | -12.64 |

|     |                  |              |              |              |              |                    |                    |                                                                                     |        |        |
|-----|------------------|--------------|--------------|--------------|--------------|--------------------|--------------------|-------------------------------------------------------------------------------------|--------|--------|
| 119 | PC ae<br>C40:6   | 3.479(0.929) | 3.441(0.862) | 2.842(0.682) | 2.964(0.782) | <b>0.007**</b>     | <b>0.014*</b>      | pre-ctrl-post-ctrl;<br>pre-del-post-ctrl                                            | -18.32 | -13.87 |
| 120 | PC ae<br>C42:1   | 0.211(0.050) | 0.222(0.056) | 0.195(0.057) | 0.204(0.060) | 0.207              | 0.242              | -                                                                                   | -7.50  | -8.24  |
| 121 | PC ae<br>C42:2   | 0.369(0.094) | 0.352(0.079) | 0.310(0.094) | 0.321(0.081) | <b>0.026*</b>      | <b>0.040*</b>      | -                                                                                   | -15.82 | -8.77  |
| 122 | PC ae<br>C42:3   | 0.523(0.163) | 0.490(0.111) | 0.427(0.139) | 0.425(0.110) | <b>0.008**</b>     | <b>0.015*</b>      | pre-ctrl-post-del                                                                   | -18.50 | -13.25 |
| 123 | PC ae<br>C42:4   | 0.684(0.190) | 0.601(0.158) | 0.557(0.193) | 0.525(0.144) | <b>0.007**</b>     | <b>0.014*</b>      | pre-ctrl-post-del                                                                   | -18.66 | -12.59 |
| 124 | PC ae<br>C42:5   | 1.567(0.448) | 1.505(0.346) | 1.308(0.338) | 1.315(0.346) | <b>0.021*</b>      | <b>0.033*</b>      | -                                                                                   | -16.56 | -12.57 |
| 125 | PC ae<br>C44:3   | 0.093(0.019) | 0.088(0.022) | 0.075(0.026) | 0.078(0.030) | <b>0.016*</b>      | <b>0.026*</b>      | pre-ctrl-post-ctrl                                                                  | -18.92 | -11.02 |
| 126 | PC ae<br>C44:4   | 0.309(0.102) | 0.301(0.061) | 0.273(0.085) | 0.258(0.093) | <b>0.034*</b>      | <b>0.049*</b>      | pre-del-post-del                                                                    | -11.66 | -14.39 |
| 127 | PC ae<br>C44:5   | 1.490(0.472) | 1.355(0.380) | 1.163(0.346) | 1.198(0.382) | <b>0.011*</b>      | <b>0.019*</b>      | pre-ctrl-post-ctrl                                                                  | -21.95 | -11.61 |
| 128 | PC ae<br>C44:6   | 1.128(0.349) | 1.065(0.309) | 0.871(0.235) | 0.860(0.286) | <b>0.002**</b>     | <b>0.006**</b>     | pre-ctrl-post-ctrl;<br>pre-ctrl-post-del;<br>pre-del-post-del                       | -22.80 | -19.27 |
| 129 | SM (OH)<br>C14:1 | 3.197(0.802) | 3.247(0.852) | 2.499(0.732) | 2.484(0.718) | <b>1.50E-04***</b> | <b>0.001**</b>     | pre-ctrl-post-ctrl;<br>pre-ctrl-post-del;<br>pre-del-post-ctrl;<br>pre-del-post-del | -21.82 | -23.50 |
| 130 | SM (OH)<br>C16:1 | 1.835(0.476) | 1.886(0.520) | 1.406(0.391) | 1.409(0.462) | <b>3.10E-05***</b> | <b>3.57E-04***</b> | pre-ctrl-post-ctrl;<br>pre-ctrl-post-del;<br>pre-del-post-ctrl;<br>pre-del-post-del | -23.37 | -25.29 |
| 131 | SM (OH)<br>C22:1 | 3.155(1.906) | 2.773(1.435) | 2.181(1.298) | 1.540(0.960) | <b>0.001**</b>     | <b>0.004**</b>     | pre-ctrl-post-del;<br>pre-del-post-del                                              | -30.88 | -44.45 |
| 132 | SM (OH)<br>C22:2 | 5.565(2.194) | 5.696(2.265) | 4.097(1.675) | 3.466(1.390) | <b>2.30E-05***</b> | <b>2.89E-04***</b> | pre-ctrl-post-ctrl;<br>pre-ctrl-post-del;<br>pre-del-post-ctrl;<br>pre-del-post-del | -26.38 | -39.16 |
| 133 | SM C16:0         | 57.12(15.25) | 57.20(11.88) | 44.01(11.53) | 43.19(9.89)  | <b>2.00E-06***</b> | <b>1.38E-04***</b> | pre-ctrl-post-ctrl;<br>pre-ctrl-post-del;<br>pre-del-post-ctrl;<br>pre-del-post-del | -22.95 | -24.49 |
| 134 | SM C16:1         | 8.552(2.487) | 8.172(1.798) | 6.444(1.670) | 6.134(1.504) | <b>9.00E-06***</b> | <b>1.73E-04***</b> | pre-ctrl-post-ctrl;<br>pre-ctrl-                                                    | -24.64 | -24.94 |

|     |          |                 |                 |                  |                  |                    |                    |                                                                            |        |        |
|-----|----------|-----------------|-----------------|------------------|------------------|--------------------|--------------------|----------------------------------------------------------------------------|--------|--------|
|     |          |                 |                 |                  |                  |                    |                    | post-del; pre-del-post-ctrl; pre-del-post-del                              |        |        |
| 135 | SM C18:0 | 15.50(3.71)     | 14.73(3.45)     | 11.98(2.89)      | 11.29(3.25)      | <b>6.00E-06***</b> | <b>1.61E-04***</b> | pre-ctrl-post-ctrl; pre-ctrl-post-del; pre-del-post-ctrl; pre-del-post-del | -22.72 | -23.36 |
| 136 | SM C18:1 | 6.410(1.713)    | 5.939(1.463)    | 4.906(1.176)     | 4.566(1.346)     | <b>1.00E-05***</b> | <b>1.73E-04***</b> | pre-ctrl-post-ctrl; pre-ctrl-post-del; pre-del-post-ctrl; pre-del-post-del | -23.46 | -23.12 |
| 137 | SM C24:0 | 10.42(2.53)     | 10.18(1.92)     | 8.18(2.01)       | 7.72(1.79)       | <b>3.00E-06***</b> | <b>1.38E-04***</b> | pre-ctrl-post-ctrl; pre-ctrl-post-del; pre-del-post-ctrl; pre-del-post-del | -21.47 | -24.15 |
| 138 | H1       | 5568.88(686.17) | 5333.21(941.35) | 5984.62(1183.25) | 5801.71(1412.21) | 0.107              | 0.134              | -                                                                          | 7.47   | 8.78   |

Significant *p*-values are shown in bold. \**p* < 0.05, \*\**p* < 0.01, \*\*\* *p* < 0.001 across 4 groups comparisons (pre-ctrl, pre-del, post-ctrl, and post-del). *q*-values are from Benjamini-Hochberg. Significant *q*-values are shown in bold. \**q* < 0.05, \*\**q* < 0.01, \*\*\* *q* < 0.001 across 4 groups comparisons (pre-ctrl, pre-del, post-ctrl, and post-del). Pre-Ctrl: pre-operative control; Pre-Del: pre-operative delirium; Post-Ctrl: post-operative control; Post-Del: post-operative delirium; SD: standard deviation; Ala: alanine; Arg: arginine; Asn: asparagine; Asp: aspartate; Cit: citrulline; Gln: glutamine; Glu: glutamate; Gly: glycine; His: histidine; Ile: isoleucine; Leu: leucine; Lys: lysine; Met: methionine; Orn: ornithine; Phe: phenylalanine; Pro: proline; Ser: serine; Thr: threonine; Trp: tryptophan; Tyr: tyrosine; Val: valine; ADMA: asymmetric dimethylarginine; SDMA: symmetric dimethylarginine; H1: hexose.

**Supplementary Table S4.** Univariate analysis of perioperative variables between control and delirium.

| Types of drugs                               | Control | Delirium | <i>p</i> -Value |
|----------------------------------------------|---------|----------|-----------------|
| <b><u>Premedications</u></b>                 |         |          |                 |
| Multi-premedication (Yes)                    | 24/26   | 20/22    | <b>0.043*</b>   |
| PreMed-Ranitidine (Yes)                      | 14/26   | 9/22     | <b>0.029*</b>   |
| PreMed-PPI (Yes)                             | 8/26    | 5/22     | <b>0.036*</b>   |
| PreMed-Benzodiazepine (Yes)                  | 13/26   | 10/22    | <b>0.041*</b>   |
| <b><u>Anesthesia</u></b>                     |         |          |                 |
| General Anesthesia (Yes)                     | 1/26    | 3/28     | 0.658           |
| Perioperative iv midazolam (Yes)             | 16/26   | 16/21    | <b>0.014*</b>   |
| Intraoperative sedation (propofol) (Yes)     | 23/26   | 18/21    | <b>0.023*</b>   |
| Ketamine (Yes)                               | 2/26    | 2/22     | <b>0.043*</b>   |
| <b><u>Painkillers</u></b>                    |         |          |                 |
| Intravenous IV opioid (Yes)                  | 2/26    | 6/21     | <b>0.004**</b>  |
| Peripheral nerve block/plexus blockade (Yes) | 7/26    | 9/21     | <b>0.012*</b>   |
| Analgesics (Yes)                             | 3/24    | 2/22     | 0.341           |
| <b><u>Antibiotics</u></b>                    |         |          |                 |
| Flucloxacillin (Yes)                         | 18/24   | 17/22    | 0.359           |

|                                  |       |       |               |
|----------------------------------|-------|-------|---------------|
| Cefuroxime (Yes)                 | 1/24  | 3/22  | 0.191         |
| Teicoplanin (Yes)                | 5/24  | 2/22  | 0.198         |
| Gentamicin (Yes)                 | 18/24 | 17/22 | 0.359         |
| <b><u>Others</u></b>             |       |       |               |
| Intraoperative tachycardia (Yes) | 6/25  | 2/20  | <b>0.025*</b> |
| Intraoperative hypotension (Yes) | 11/25 | 7/20  | <b>0.043*</b> |
| Ephedrine (Yes)                  | 7/26  | 4/22  | <b>0.034*</b> |
| Dexamethasone (Yes)              | 12/26 | 10/22 | <b>0.043*</b> |
| Chlorphenamine (Yes)             | 1/26  | 2/22  | <b>0.033*</b> |
| Magnesium Sulphate (Yes)         | 3/26  | 1/22  | <b>0.030*</b> |
| Ondansetron (Yes)                | 22/26 | 20/22 | <b>0.035*</b> |
| Prochlorperazine (Yes)           | 7/26  | 4/22  | <b>0.034*</b> |

Significant *p*-values are shown in bold. \**p* < 0.05, \*\**p* < 0.01 control vs. delirium. Chi-square was conducted for comparison. PPI; Proton-pump inhibitor. Multi-premedication includes ranitidine, PPI, and benzodiazepine.

**Supplementary Table S5.** The association between perioperative variables and % change in all metabolites.

| Metabolites | Infusions                                 |                      |                                           |                                         | Premedications         |                 |                                  | Anesthesia                        |                      |                            |                      | Painkillers                                                  |                    |                              |
|-------------|-------------------------------------------|----------------------|-------------------------------------------|-----------------------------------------|------------------------|-----------------|----------------------------------|-----------------------------------|----------------------|----------------------------|----------------------|--------------------------------------------------------------|--------------------|------------------------------|
|             | Total in-<br>traoperative<br>fluid volume | Hartmann's<br>volume | Tetra-<br>span/Gelof<br>usion vol-<br>ume | Multi-<br>medi-cati-<br>ons<br>(Yes/No) | Ranitidine<br>(Yes/No) | PPI<br>(Yes/No) | Benzodi-<br>aze-pine<br>(Yes/No) | General<br>anesthesia<br>(Yes/No) | Ketamine<br>(Yes/No) | Midazo-<br>lam<br>(Yes/No) | Propofol<br>(Yes/No) | Peripheral<br>nerve<br>block/plexu<br>s blockade<br>(Yes/No) | Opioid<br>(Yes/No) | Diamor-<br>phine<br>(Yes/No) |
|             | q-Value                                   | q-Value              | q-Value                                   | q-Value                                 | q-Value                | q-Value         | q-Value                          | q-Value                           | q-Value              | q-Value                    | q-Value              | q-Value                                                      | q-Value            | q-Value                      |
| C0          | 0.802                                     | 0.930                | 0.713                                     | 0.996                                   | 0.878                  | 0.934           | 0.970                            | 0.622                             | 0.887                | 0.993                      | 0.854                | 0.375                                                        | 0.690              | 0.913                        |
| C141        | 0.603                                     | 0.977                | 0.651                                     | 0.985                                   | 0.878                  | 0.878           | 0.975                            | 0.778                             | 0.789                | 0.993                      | 0.907                | 0.113                                                        | 0.986              | 0.977                        |
| C142        | 0.420                                     | 0.930                | 0.725                                     | 0.985                                   | 0.927                  | 0.962           | 0.970                            | 0.622                             | 0.518                | 0.993                      | 0.907                | 0.217                                                        | 0.986              | 0.913                        |
| C16         | 0.375                                     | 0.930                | 0.569                                     | 0.996                                   | 0.932                  | 0.962           | 0.970                            | 0.469                             | 0.887                | 0.997                      | 0.854                | <b>0.009**</b>                                               | 0.986              | 0.913                        |
| C161        | 0.536                                     | 0.930                | 0.745                                     | 0.985                                   | 0.878                  | 0.878           | 0.980                            | 0.781                             | 0.958                | 0.993                      | 0.907                | 0.171                                                        | 0.986              | 0.913                        |
| C18         | 0.807                                     | 0.930                | 0.477                                     | 0.985                                   | 0.880                  | 0.962           | 0.970                            | 0.554                             | 0.887                | 0.993                      | 0.907                | <b>0.024*</b>                                                | 0.986              | 0.913                        |
| C181        | 0.949                                     | 0.930                | 0.477                                     | 0.985                                   | 0.878                  | 0.878           | 0.970                            | 0.554                             | 0.892                | 0.993                      | 0.854                | <b>0.010*</b>                                                | 0.986              | 0.913                        |
| C2          | 0.719                                     | 0.930                | 0.665                                     | 0.985                                   | 0.878                  | 0.962           | 0.970                            | 0.554                             | 0.789                | 0.993                      | 0.962                | 0.895                                                        | 0.986              | 0.913                        |
| C3          | 0.610                                     | 0.987                | 0.569                                     | 0.985                                   | 0.878                  | 0.962           | 0.970                            | 0.800                             | 0.909                | 0.993                      | 0.907                | 0.833                                                        | 0.986              | 0.913                        |
| C5          | 0.528                                     | 0.930                | 0.651                                     | 0.985                                   | 0.878                  | 0.999           | 0.975                            | 0.554                             | 0.892                | 0.993                      | 0.907                | 0.543                                                        | 0.986              | 0.913                        |
| C51DC       | 0.801                                     | 0.930                | 0.665                                     | 0.985                                   | 0.927                  | 0.962           | 0.970                            | 0.554                             | 0.789                | 0.993                      | 0.976                | 0.814                                                        | 0.986              | 0.913                        |
| C7DC        | 0.528                                     | 0.930                | 0.823                                     | 0.985                                   | 0.878                  | 0.999           | 0.970                            | 0.991                             | 0.892                | 0.993                      | 0.854                | 0.925                                                        | 0.986              | 0.913                        |
| Ala         | 0.804                                     | 0.930                | 0.569                                     | 0.985                                   | 0.878                  | 0.962           | 0.970                            | 0.362                             | 0.887                | 0.993                      | 0.907                | 0.115                                                        | 0.986              | 0.913                        |
| Arg         | 0.640                                     | 0.930                | 0.665                                     | 0.985                                   | 0.878                  | 0.878           | 0.970                            | 0.850                             | 0.892                | 0.993                      | 0.854                | 0.164                                                        | 0.986              | 0.913                        |
| Asn         | 0.802                                     | 0.930                | 0.578                                     | 0.985                                   | 0.878                  | 0.962           | 0.970                            | 0.885                             | 0.924                | 0.993                      | 0.854                | 0.340                                                        | 0.986              | 0.913                        |
| Asp         | 0.949                                     | 0.930                | 0.477                                     | 0.985                                   | 0.878                  | 0.962           | 0.970                            | 0.315                             | 0.887                | 0.993                      | 0.962                | 0.309                                                        | 0.986              | 0.913                        |
| Cit         | 0.726                                     | 0.930                | 0.541                                     | 0.996                                   | 0.878                  | 0.878           | 0.970                            | 0.882                             | 0.892                | 0.993                      | 0.976                | 0.979                                                        | 0.986              | 0.994                        |
| Gln         | 0.528                                     | 0.800                | 0.569                                     | 0.985                                   | 0.878                  | 0.878           | 0.970                            | 0.554                             | 0.892                | 0.993                      | 0.907                | <b>0.049*</b>                                                | 0.986              | 0.913                        |
| Glu         | 0.801                                     | 0.828                | 0.569                                     | 0.985                                   | 0.985                  | 0.962           | 0.970                            | 0.554                             | 0.887                | 0.993                      | 0.854                | 0.053                                                        | 0.986              | 0.968                        |
| Gly         | 0.569                                     | 0.930                | 0.736                                     | 0.985                                   | 0.878                  | 0.937           | 0.970                            | 0.242                             | 0.944                | 0.993                      | 0.976                | <b>0.032*</b>                                                | 0.986              | 0.913                        |
| His         | 0.454                                     | 0.828                | 0.726                                     | 0.985                                   | 0.878                  | 0.878           | 0.970                            | 0.632                             | 0.892                | 0.993                      | 0.907                | 0.166                                                        | 0.986              | 0.977                        |
| Ile         | 0.398                                     | 0.930                | 0.846                                     | 0.985                                   | 0.878                  | 0.962           | 0.970                            | 0.555                             | 0.892                | 0.993                      | 0.907                | 0.424                                                        | 0.986              | 0.913                        |
| Leu         | 0.804                                     | 0.930                | 0.569                                     | 0.985                                   | 0.878                  | 0.962           | 0.970                            | 0.692                             | 0.892                | 0.993                      | 0.962                | 0.166                                                        | 0.986              | 0.913                        |
| Lys         | 0.594                                     | 0.930                | 0.941                                     | 0.985                                   | 0.878                  | 0.937           | 0.970                            | 0.882                             | 0.789                | 0.993                      | 0.945                | 0.232                                                        | 0.986              | 0.913                        |
| Met         | 0.610                                     | 0.930                | 0.885                                     | 0.996                                   | 0.878                  | 0.962           | 0.970                            | 0.554                             | 0.892                | 0.993                      | 0.854                | 0.250                                                        | 0.986              | 0.913                        |

|             |       |       |       |       |       |       |       |       |       |       |       |               |       |       |
|-------------|-------|-------|-------|-------|-------|-------|-------|-------|-------|-------|-------|---------------|-------|-------|
| Orn         | 0.426 | 0.930 | 0.736 | 0.985 | 0.878 | 0.878 | 0.970 | 0.242 | 0.887 | 0.993 | 0.907 | <b>0.040*</b> | 0.690 | 0.976 |
| Phe         | 0.539 | 0.930 | 0.894 | 0.987 | 0.878 | 0.878 | 0.970 | 0.778 | 0.887 | 0.993 | 0.907 | 0.118         | 0.986 | 0.913 |
| Pro         | 0.426 | 0.930 | 0.819 | 0.985 | 0.878 | 0.937 | 0.970 | 0.555 | 0.892 | 0.993 | 0.907 | 0.104         | 0.986 | 0.913 |
| Ser         | 0.615 | 0.930 | 0.809 | 0.985 | 0.878 | 0.878 | 0.970 | 0.554 | 0.911 | 0.993 | 0.854 | 0.086         | 0.986 | 0.913 |
| Thr         | 0.603 | 0.930 | 0.725 | 0.985 | 0.878 | 0.934 | 0.970 | 0.554 | 0.887 | 0.993 | 0.907 | 0.132         | 0.986 | 0.913 |
| Trp         | 0.939 | 0.930 | 0.614 | 0.985 | 0.878 | 0.878 | 0.970 | 0.555 | 0.951 | 0.993 | 0.976 | 0.904         | 0.986 | 0.913 |
| Tyr         | 0.610 | 0.930 | 0.729 | 0.985 | 0.878 | 0.828 | 0.970 | 0.829 | 0.789 | 0.993 | 0.854 | 0.082         | 0.986 | 0.971 |
| Val         | 0.293 | 0.828 | 0.712 | 0.985 | 0.878 | 0.878 | 0.970 | 0.764 | 0.892 | 0.993 | 0.854 | 0.275         | 0.986 | 0.913 |
| ADMA        | 0.804 | 0.930 | 0.569 | 0.985 | 0.878 | 0.999 | 0.975 | 0.554 | 0.789 | 0.993 | 0.907 | 0.516         | 0.986 | 0.977 |
| Creatine    | 0.806 | 0.930 | 0.728 | 0.996 | 0.878 | 0.962 | 0.970 | 0.707 | 0.937 | 0.993 | 0.907 | 0.372         | 0.986 | 0.913 |
| Kynurenine  | 0.844 | 0.930 | 0.925 | 0.985 | 0.906 | 0.962 | 0.970 | 0.554 | 0.789 | 0.993 | 0.907 | 0.262         | 0.986 | 0.913 |
| MetSO       | 0.777 | 0.930 | 0.569 | 0.985 | 0.878 | 0.962 | 0.970 | 0.746 | 0.789 | 0.993 | 0.907 | 0.809         | 0.986 | 0.986 |
| Putrescine  | 0.946 | 0.930 | 0.477 | 0.985 | 0.878 | 0.999 | 0.970 | 0.707 | 0.892 | 0.993 | 0.993 | 0.609         | 0.986 | 0.913 |
| Sarcosine   | 0.804 | 0.930 | 0.569 | 0.985 | 0.878 | 0.999 | 0.970 | 0.692 | 0.892 | 0.993 | 0.976 | 0.347         | 0.986 | 0.913 |
| Serotonin   | 0.426 | 0.930 | 0.477 | 0.985 | 0.878 | 0.999 | 0.970 | 0.720 | 0.892 | 0.993 | 0.976 | 0.337         | 0.986 | 0.913 |
| Spermidine  | 0.804 | 0.951 | 0.477 | 0.985 | 0.963 | 0.962 | 0.970 | 0.554 | 0.789 | 0.993 | 0.907 | 0.904         | 0.986 | 0.994 |
| Spermine    | 0.922 | 0.930 | 0.477 | 0.985 | 0.878 | 0.962 | 0.975 | 0.385 | 0.138 | 0.993 | 0.907 | 0.571         | 0.986 | 0.913 |
| t4OHPro     | 0.426 | 0.800 | 0.477 | 0.985 | 0.878 | 0.962 | 0.970 | 0.083 | 0.892 | 0.993 | 0.907 | <b>0.010*</b> | 0.690 | 0.913 |
| Taurine     | 0.967 | 0.930 | 0.569 | 0.996 | 0.878 | 0.962 | 0.970 | 0.990 | 0.518 | 0.993 | 0.962 | 0.882         | 0.986 | 0.913 |
| SDMA        | 0.610 | 0.930 | 0.477 | 0.985 | 0.878 | 0.962 | 0.970 | 0.069 | 0.924 | 0.993 | 0.907 | 0.159         | 0.986 | 0.913 |
| lysoPCaC160 | 0.426 | 0.930 | 0.706 | 0.985 | 0.878 | 0.934 | 0.970 | 0.554 | 0.887 | 0.993 | 0.854 | <b>0.043*</b> | 0.986 | 0.913 |
| lysoPCaC161 | 0.510 | 0.930 | 0.665 | 0.985 | 0.878 | 0.962 | 0.980 | 0.554 | 0.892 | 0.993 | 0.907 | <b>0.030*</b> | 0.986 | 0.913 |
| lysoPCaC170 | 0.426 | 0.930 | 0.569 | 0.996 | 0.878 | 0.878 | 0.975 | 0.468 | 0.518 | 0.993 | 0.907 | 0.144         | 0.986 | 0.913 |
| lysoPCaC180 | 0.420 | 0.930 | 0.665 | 0.996 | 0.878 | 0.878 | 0.970 | 0.554 | 0.887 | 0.993 | 0.893 | <b>0.035*</b> | 0.986 | 0.913 |
| lysoPCaC181 | 0.610 | 0.930 | 0.712 | 0.985 | 0.878 | 0.878 | 0.970 | 0.685 | 0.887 | 0.993 | 0.907 | 0.059         | 0.986 | 0.913 |
| lysoPCaC182 | 0.528 | 0.930 | 0.665 | 0.985 | 0.878 | 0.878 | 0.970 | 0.554 | 0.892 | 0.993 | 0.907 | 0.056         | 0.986 | 0.913 |
| lysoPCaC203 | 0.399 | 0.930 | 0.477 | 0.985 | 0.878 | 0.878 | 0.970 | 0.692 | 0.957 | 0.993 | 0.854 | <b>0.040*</b> | 0.986 | 0.913 |
| lysoPCaC204 | 0.580 | 0.930 | 0.569 | 0.985 | 0.878 | 0.878 | 0.975 | 0.554 | 0.892 | 0.993 | 0.907 | <b>0.040*</b> | 0.986 | 0.913 |
| lysoPCaC240 | 0.949 | 0.930 | 0.569 | 0.985 | 0.878 | 0.962 | 0.970 | 0.554 | 0.887 | 0.993 | 0.854 | <b>0.010*</b> | 0.986 | 0.913 |
| lysoPCaC260 | 0.909 | 0.930 | 0.477 | 0.985 | 0.937 | 0.999 | 0.980 | 0.400 | 0.887 | 0.993 | 0.854 | 0.390         | 0.986 | 0.794 |
| lysoPCaC261 | 0.610 | 0.930 | 0.712 | 0.996 | 0.878 | 0.962 | 0.980 | 0.069 | 0.892 | 0.993 | 0.907 | 0.081         | 0.986 | 0.635 |
| lysoPCaC280 | 0.603 | 0.930 | 0.477 | 0.985 | 0.878 | 0.999 | 0.975 | 0.069 | 0.892 | 0.993 | 0.907 | <b>0.043*</b> | 0.986 | 0.794 |
| lysoPCaC281 | 0.640 | 0.930 | 0.477 | 0.996 | 0.927 | 0.999 | 0.975 | 0.237 | 0.892 | 0.993 | 0.976 | 0.120         | 0.986 | 0.414 |
| PCaaC240    | 0.725 | 0.930 | 0.477 | 0.985 | 0.878 | 0.999 | 0.970 | 0.069 | 0.887 | 0.993 | 0.907 | <b>0.042*</b> | 0.986 | 0.913 |

|          |       |       |       |       |       |       |       |       |       |       |       |                |       |       |
|----------|-------|-------|-------|-------|-------|-------|-------|-------|-------|-------|-------|----------------|-------|-------|
| PCaaC281 | 0.293 | 0.930 | 0.836 | 0.985 | 0.927 | 0.999 | 0.970 | 0.242 | 0.887 | 0.993 | 0.907 | <b>0.008**</b> | 0.986 | 0.913 |
| PCaaC300 | 0.420 | 0.930 | 0.569 | 0.996 | 0.878 | 0.962 | 0.970 | 0.554 | 0.789 | 0.993 | 0.907 | <b>0.024*</b>  | 0.986 | 0.913 |
| PCaaC320 | 0.293 | 0.930 | 0.569 | 0.996 | 0.878 | 0.962 | 0.970 | 0.554 | 0.887 | 0.993 | 0.907 | <b>0.024*</b>  | 0.986 | 0.913 |
| PCaaC321 | 0.375 | 0.930 | 0.569 | 0.996 | 0.878 | 0.962 | 0.975 | 0.692 | 0.789 | 0.993 | 0.907 | <b>0.043*</b>  | 0.986 | 0.913 |
| PCaaC323 | 0.375 | 0.930 | 0.712 | 0.985 | 0.938 | 0.999 | 0.980 | 0.115 | 0.937 | 0.993 | 0.907 | <b>0.024*</b>  | 0.986 | 0.913 |
| PCaaC341 | 0.375 | 0.930 | 0.569 | 0.996 | 0.878 | 0.962 | 0.970 | 0.692 | 0.887 | 0.993 | 0.907 | 0.052          | 0.986 | 0.913 |
| PCaaC342 | 0.293 | 0.930 | 0.569 | 0.985 | 0.878 | 0.962 | 0.970 | 0.622 | 0.887 | 0.993 | 0.893 | <b>0.033*</b>  | 0.986 | 0.913 |
| PCaaC343 | 0.420 | 0.930 | 0.569 | 0.996 | 0.878 | 0.962 | 0.970 | 0.554 | 0.887 | 0.993 | 0.907 | <b>0.026*</b>  | 0.986 | 0.913 |
| PCaaC344 | 0.528 | 0.930 | 0.632 | 0.985 | 0.927 | 0.962 | 0.980 | 0.554 | 0.892 | 0.993 | 0.893 | <b>0.030*</b>  | 0.986 | 0.913 |
| PCaaC360 | 0.949 | 0.930 | 0.569 | 0.985 | 0.937 | 0.999 | 0.970 | 0.727 | 0.951 | 0.993 | 0.907 | 0.375          | 0.986 | 0.913 |
| PCaaC361 | 0.497 | 0.930 | 0.712 | 0.996 | 0.878 | 0.962 | 0.970 | 0.554 | 0.892 | 0.993 | 0.907 | <b>0.033*</b>  | 0.986 | 0.913 |
| PCaaC362 | 0.528 | 0.930 | 0.665 | 0.985 | 0.904 | 0.977 | 0.970 | 0.554 | 0.892 | 0.993 | 0.907 | <b>0.040*</b>  | 0.986 | 0.913 |
| PCaaC363 | 0.439 | 0.930 | 0.665 | 0.985 | 0.927 | 0.962 | 0.970 | 0.554 | 0.892 | 0.993 | 0.854 | <b>0.024*</b>  | 0.986 | 0.913 |
| PCaaC364 | 0.426 | 0.930 | 0.665 | 0.985 | 0.910 | 0.977 | 0.970 | 0.692 | 0.892 | 0.993 | 0.893 | <b>0.043*</b>  | 0.986 | 0.913 |
| PCaaC365 | 0.610 | 0.930 | 0.758 | 0.985 | 0.878 | 0.999 | 0.975 | 0.554 | 0.937 | 0.993 | 0.893 | 0.054          | 0.986 | 0.913 |
| PCaaC366 | 0.426 | 0.930 | 0.665 | 0.985 | 0.878 | 0.962 | 0.975 | 0.602 | 0.892 | 0.993 | 0.854 | <b>0.010*</b>  | 0.986 | 0.913 |
| PCaaC380 | 0.510 | 0.930 | 0.569 | 0.985 | 0.878 | 0.962 | 0.975 | 0.555 | 0.892 | 0.993 | 0.854 | <b>0.046*</b>  | 0.986 | 0.913 |
| PCaaC383 | 0.539 | 0.930 | 0.765 | 0.985 | 0.878 | 0.966 | 0.970 | 0.554 | 0.892 | 0.993 | 0.854 | <b>0.022*</b>  | 0.986 | 0.913 |
| PCaaC384 | 0.539 | 0.930 | 0.765 | 0.996 | 0.878 | 0.962 | 0.975 | 0.555 | 0.892 | 0.993 | 0.893 | <b>0.047*</b>  | 0.986 | 0.913 |
| PCaaC385 | 0.569 | 0.930 | 0.725 | 0.996 | 0.878 | 0.962 | 0.970 | 0.554 | 0.892 | 0.993 | 0.907 | 0.052          | 0.986 | 0.913 |
| PCaaC386 | 0.564 | 0.930 | 0.736 | 0.985 | 0.878 | 0.962 | 0.980 | 0.554 | 0.892 | 0.993 | 0.893 | <b>0.036*</b>  | 0.986 | 0.913 |
| PCaaC402 | 0.784 | 0.930 | 0.477 | 0.985 | 0.878 | 0.878 | 0.970 | 0.555 | 0.946 | 0.993 | 0.854 | 0.142          | 0.986 | 0.913 |
| PCaaC403 | 0.439 | 0.930 | 0.776 | 0.985 | 0.878 | 0.962 | 0.970 | 0.340 | 0.892 | 0.993 | 0.854 | <b>0.005**</b> | 0.986 | 0.913 |
| PCaaC404 | 0.777 | 0.930 | 0.569 | 0.996 | 0.878 | 0.878 | 0.970 | 0.622 | 0.892 | 0.993 | 0.907 | <b>0.024*</b>  | 0.986 | 0.977 |
| PCaaC405 | 0.528 | 0.930 | 0.569 | 0.996 | 0.878 | 0.999 | 0.975 | 0.554 | 0.957 | 0.993 | 0.854 | 0.135          | 0.986 | 0.913 |
| PCaaC406 | 0.569 | 0.930 | 0.725 | 0.985 | 0.878 | 0.962 | 0.970 | 0.622 | 0.937 | 0.993 | 0.854 | <b>0.046*</b>  | 0.986 | 0.913 |
| PCaaC420 | 0.949 | 0.930 | 0.765 | 0.985 | 0.937 | 0.962 | 0.970 | 0.829 | 0.892 | 0.993 | 0.854 | 0.166          | 0.986 | 0.913 |
| PCaaC421 | 0.804 | 0.930 | 0.541 | 0.985 | 0.878 | 0.999 | 0.970 | 0.554 | 0.892 | 0.993 | 0.854 | <b>0.016*</b>  | 0.986 | 0.994 |
| PCaaC422 | 0.676 | 0.930 | 0.477 | 0.985 | 0.916 | 0.999 | 0.970 | 0.242 | 0.892 | 0.993 | 0.962 | <b>0.010*</b>  | 0.986 | 0.913 |
| PCaaC424 | 0.807 | 0.930 | 0.477 | 0.985 | 0.894 | 0.999 | 0.975 | 0.727 | 0.892 | 0.993 | 0.907 | 0.088          | 0.986 | 0.977 |
| PCaaC425 | 0.610 | 0.930 | 0.776 | 0.996 | 0.878 | 0.962 | 0.975 | 0.749 | 0.892 | 0.993 | 0.877 | 0.286          | 0.986 | 0.635 |
| PCaaC426 | 0.844 | 0.930 | 0.792 | 0.985 | 0.927 | 0.999 | 0.970 | 0.464 | 0.892 | 0.993 | 0.993 | <b>0.028*</b>  | 0.986 | 0.913 |
| PCaeC300 | 0.426 | 0.930 | 0.569 | 0.985 | 0.880 | 0.962 | 0.970 | 0.692 | 0.924 | 0.993 | 0.907 | 0.401          | 0.986 | 0.414 |
| PCaeC301 | 0.580 | 0.930 | 0.477 | 0.985 | 0.878 | 0.962 | 0.970 | 0.242 | 0.892 | 0.993 | 0.976 | <b>0.010*</b>  | 0.986 | 0.794 |



|          |       |       |       |       |       |       |       |       |       |       |       |               |       |       |
|----------|-------|-------|-------|-------|-------|-------|-------|-------|-------|-------|-------|---------------|-------|-------|
| PCaeC302 | 0.769 | 0.930 | 0.569 | 0.985 | 0.963 | 0.999 | 0.980 | 0.315 | 0.892 | 0.993 | 0.907 | 0.059         | 0.986 | 0.552 |
| PCaeC321 | 0.439 | 0.930 | 0.569 | 0.996 | 0.878 | 0.962 | 0.970 | 0.554 | 0.789 | 0.993 | 0.907 | <b>0.035*</b> | 0.986 | 0.913 |
| PCaeC322 | 0.804 | 0.930 | 0.479 | 0.985 | 0.927 | 0.975 | 0.970 | 0.778 | 0.892 | 0.993 | 0.854 | <b>0.024*</b> | 0.986 | 0.913 |
| PCaeC340 | 0.610 | 0.930 | 0.665 | 0.985 | 0.878 | 0.878 | 0.975 | 0.554 | 0.887 | 0.993 | 0.893 | <b>0.020*</b> | 0.986 | 0.913 |
| PCaeC341 | 0.610 | 0.966 | 0.569 | 0.985 | 0.878 | 0.962 | 0.970 | 0.554 | 0.976 | 0.993 | 0.893 | 0.052         | 0.986 | 0.913 |
| PCaeC342 | 0.536 | 0.930 | 0.569 | 0.985 | 0.878 | 0.962 | 0.970 | 0.554 | 0.950 | 0.993 | 0.854 | <b>0.030*</b> | 0.986 | 0.913 |
| PCaeC343 | 0.528 | 0.930 | 0.587 | 0.985 | 0.878 | 0.962 | 0.970 | 0.560 | 0.937 | 0.993 | 0.854 | <b>0.035*</b> | 0.986 | 0.913 |
| PCaeC360 | 0.667 | 0.930 | 0.477 | 0.985 | 0.878 | 0.962 | 0.970 | 0.385 | 0.892 | 0.993 | 0.907 | <b>0.010*</b> | 0.986 | 0.913 |
| PCaeC361 | 0.610 | 0.934 | 0.477 | 0.985 | 0.878 | 0.962 | 0.970 | 0.554 | 0.892 | 0.993 | 0.854 | <b>0.020*</b> | 0.986 | 0.913 |
| PCaeC362 | 0.510 | 0.930 | 0.477 | 0.985 | 0.878 | 0.962 | 0.970 | 0.554 | 0.892 | 0.993 | 0.854 | <b>0.016*</b> | 0.986 | 0.913 |
| PCaeC363 | 0.610 | 0.977 | 0.477 | 0.987 | 0.878 | 0.962 | 0.970 | 0.632 | 0.892 | 0.993 | 0.854 | 0.081         | 0.986 | 0.913 |
| PCaeC364 | 0.536 | 0.930 | 0.569 | 0.985 | 0.878 | 0.962 | 0.970 | 0.554 | 0.892 | 0.993 | 0.854 | <b>0.022*</b> | 0.986 | 0.913 |
| PCaeC365 | 0.426 | 0.930 | 0.569 | 0.985 | 0.937 | 0.999 | 0.970 | 0.554 | 0.924 | 0.993 | 0.854 | <b>0.022*</b> | 0.987 | 0.913 |
| PCaeC380 | 0.777 | 0.930 | 0.477 | 0.996 | 0.878 | 0.962 | 0.970 | 0.554 | 0.892 | 0.993 | 0.854 | 0.075         | 0.986 | 0.913 |
| PCaeC381 | 0.777 | 0.930 | 0.632 | 0.985 | 0.878 | 0.962 | 0.980 | 0.554 | 0.887 | 0.993 | 0.854 | <b>0.030*</b> | 0.986 | 0.954 |
| PCaeC382 | 0.536 | 0.930 | 0.662 | 0.985 | 0.878 | 0.962 | 0.970 | 0.692 | 0.892 | 0.993 | 0.854 | 0.103         | 0.986 | 0.968 |
| PCaeC383 | 0.528 | 0.930 | 0.541 | 0.985 | 0.927 | 0.975 | 0.970 | 0.464 | 0.892 | 0.993 | 0.854 | <b>0.016*</b> | 0.986 | 0.913 |
| PCaeC384 | 0.725 | 0.930 | 0.477 | 0.985 | 0.927 | 0.966 | 0.970 | 0.554 | 0.892 | 0.993 | 0.854 | <b>0.040*</b> | 0.986 | 0.913 |
| PCaeC385 | 0.454 | 0.930 | 0.596 | 0.985 | 0.878 | 0.962 | 0.970 | 0.554 | 0.892 | 0.993 | 0.854 | <b>0.024*</b> | 0.986 | 0.913 |
| PCaeC386 | 0.644 | 0.930 | 0.651 | 0.985 | 0.878 | 0.962 | 0.970 | 0.555 | 0.892 | 0.993 | 0.893 | <b>0.030*</b> | 0.986 | 0.986 |
| PCaeC401 | 0.619 | 0.998 | 0.477 | 0.985 | 0.927 | 0.962 | 0.970 | 0.469 | 0.887 | 0.993 | 0.907 | <b>0.022*</b> | 0.986 | 0.977 |
| PCaeC402 | 0.949 | 0.930 | 0.569 | 0.985 | 0.878 | 0.962 | 0.970 | 0.632 | 0.892 | 0.993 | 0.907 | <b>0.033*</b> | 0.986 | 0.977 |
| PCaeC403 | 0.497 | 0.930 | 0.477 | 0.985 | 0.878 | 0.934 | 0.970 | 0.554 | 0.924 | 0.993 | 0.907 | <b>0.024*</b> | 0.986 | 0.913 |
| PCaeC404 | 0.542 | 0.930 | 0.578 | 0.996 | 0.927 | 0.962 | 0.975 | 0.554 | 0.892 | 0.993 | 0.854 | <b>0.010*</b> | 0.986 | 0.913 |
| PCaeC405 | 0.542 | 0.930 | 0.477 | 0.985 | 0.878 | 0.962 | 0.970 | 0.554 | 0.892 | 0.993 | 0.854 | <b>0.035*</b> | 0.986 | 0.913 |
| PCaeC406 | 0.454 | 0.930 | 0.477 | 0.985 | 0.904 | 0.962 | 0.970 | 0.554 | 0.892 | 0.993 | 0.854 | <b>0.028*</b> | 0.986 | 0.913 |
| PCaeC421 | 0.569 | 0.930 | 0.569 | 0.985 | 0.908 | 0.962 | 0.970 | 0.871 | 0.892 | 0.993 | 0.854 | <b>0.030*</b> | 0.986 | 0.913 |
| PCaeC422 | 0.375 | 0.930 | 0.477 | 0.985 | 0.878 | 0.962 | 0.970 | 0.554 | 0.892 | 0.993 | 0.976 | 0.129         | 0.986 | 0.986 |
| PCaeC423 | 0.725 | 0.930 | 0.477 | 0.985 | 0.878 | 0.999 | 0.980 | 0.554 | 0.892 | 0.993 | 0.854 | <b>0.010*</b> | 0.986 | 0.913 |
| PCaeC424 | 0.426 | 0.977 | 0.662 | 0.985 | 0.937 | 0.962 | 0.970 | 0.554 | 0.887 | 0.993 | 0.854 | 0.286         | 0.986 | 0.913 |
| PCaeC425 | 0.528 | 0.930 | 0.477 | 0.985 | 0.878 | 0.999 | 0.970 | 0.555 | 0.892 | 0.993 | 0.854 | <b>0.020*</b> | 0.986 | 0.994 |
| PCaeC443 | 0.539 | 0.930 | 0.651 | 0.985 | 0.878 | 0.962 | 0.970 | 0.727 | 0.892 | 0.993 | 0.993 | 0.979         | 0.986 | 0.913 |
| PCaeC444 | 0.640 | 0.930 | 0.569 | 0.996 | 0.878 | 0.999 | 0.970 | 0.385 | 0.789 | 0.993 | 0.854 | 0.064         | 0.986 | 0.913 |
| PCaeC445 | 0.520 | 0.930 | 0.477 | 0.989 | 0.878 | 0.962 | 0.970 | 0.554 | 0.892 | 0.993 | 0.854 | <b>0.026*</b> | 0.986 | 0.913 |

|          |       |       |       |       |       |       |       |       |       |       |       |               |       |       |
|----------|-------|-------|-------|-------|-------|-------|-------|-------|-------|-------|-------|---------------|-------|-------|
| PCaeC446 | 0.426 | 0.977 | 0.569 | 0.985 | 0.878 | 0.962 | 0.975 | 0.692 | 0.887 | 0.993 | 0.854 | <b>0.024*</b> | 0.986 | 0.913 |
| SMOHC141 | 0.138 | 0.800 | 0.877 | 0.985 | 0.878 | 0.962 | 0.970 | 0.622 | 0.789 | 0.993 | 0.854 | <b>0.010*</b> | 0.986 | 0.913 |
| SMOHC161 | 0.399 | 0.930 | 0.838 | 0.985 | 0.937 | 0.977 | 0.970 | 0.794 | 0.892 | 0.993 | 0.907 | <b>0.036*</b> | 0.986 | 0.913 |
| SMOHC221 | 0.729 | 0.930 | 0.981 | 0.985 | 0.878 | 0.962 | 0.970 | 0.991 | 0.892 | 0.993 | 0.907 | 0.590         | 0.986 | 0.913 |
| SMOHC222 | 0.610 | 0.966 | 0.810 | 0.985 | 0.878 | 0.977 | 0.970 | 0.764 | 0.892 | 0.993 | 0.907 | 0.755         | 0.986 | 0.913 |
| SMC160   | 0.138 | 0.800 | 0.925 | 0.985 | 0.878 | 0.962 | 0.970 | 0.827 | 0.789 | 0.993 | 0.894 | <b>0.028*</b> | 0.986 | 0.977 |
| SMC161   | 0.138 | 0.800 | 0.736 | 0.985 | 0.985 | 0.962 | 0.975 | 0.554 | 0.887 | 0.993 | 0.962 | <b>0.035*</b> | 0.986 | 0.913 |
| SMC180   | 0.293 | 0.930 | 0.925 | 0.985 | 0.985 | 0.999 | 0.970 | 0.692 | 0.789 | 0.993 | 0.854 | <b>0.020*</b> | 0.986 | 0.977 |
| SMC181   | 0.398 | 0.930 | 0.993 | 0.985 | 0.927 | 0.962 | 0.970 | 0.554 | 0.789 | 0.993 | 0.854 | <b>0.010*</b> | 0.986 | 0.954 |
| SMC240   | 0.398 | 0.930 | 0.736 | 0.985 | 0.878 | 0.962 | 0.995 | 0.685 | 0.887 | 0.993 | 0.907 | 0.125         | 0.986 | 0.913 |
| H1       | 0.375 | 0.930 | 0.477 | 0.985 | 0.937 | 0.962 | 0.970 | 0.685 | 0.887 | 0.993 | 0.854 | 0.391         | 0.986 | 0.973 |

| Metabolites | Painkiller             |                            | Antibiotics            |                         |                        |                         |                       | Others                  |                           |                                |                       |                              |                              |
|-------------|------------------------|----------------------------|------------------------|-------------------------|------------------------|-------------------------|-----------------------|-------------------------|---------------------------|--------------------------------|-----------------------|------------------------------|------------------------------|
|             | Analgesics<br>(Yes/No) | Flucloxacillin<br>(Yes/No) | Cefuroxime<br>(Yes/No) | Teicoplanin<br>(Yes/No) | Gentamicin<br>(Yes/No) | Hypotension<br>(Yes/No) | Ephedrine<br>(Yes/No) | Tachycardia<br>(Yes/No) | Dexamethasone<br>(Yes/No) | Magnesium Sulphate<br>(Yes/No) | Onodanose<br>(Yes/No) | Chlorpheniramine<br>(Yes/No) | prochlorperazine<br>(Yes/No) |
|             | q-Value                | q-Value                    | q-Value                | q-Value                 | q-Value                | q-Value                 | q-Value               | q-Value                 | q-Value                   | q-Value                        | q-Value               | q-Value                      | q-Value                      |
| C0          | 0.802                  | 1.000                      | 0.998                  | 0.967                   | 0.994                  | 0.995                   | 0.754                 | 0.296                   | 0.999                     | 0.946                          | 0.993                 | 0.946                        | 0.996                        |
| C141        | 0.802                  | 1.000                      | 0.998                  | 0.967                   | 0.994                  | 0.995                   | 0.783                 | 0.986                   | 0.999                     | 0.946                          | 0.993                 | 0.946                        | 0.996                        |
| C142        | 0.802                  | 1.000                      | 0.998                  | 0.967                   | 0.994                  | 0.995                   | 0.754                 | 0.134                   | 0.999                     | 0.946                          | 0.993                 | 0.946                        | 0.996                        |
| C16         | 0.802                  | 1.000                      | 0.998                  | 0.967                   | 0.994                  | 0.995                   | 0.888                 | 0.120                   | 0.999                     | 0.946                          | 0.993                 | 0.968                        | 0.996                        |
| C161        | 0.802                  | 1.000                      | 0.998                  | 0.967                   | 0.994                  | 0.995                   | 0.754                 | 0.528                   | 0.999                     | 0.946                          | 0.993                 | 0.946                        | 0.996                        |
| C18         | 0.802                  | 1.000                      | 0.998                  | 0.967                   | 0.994                  | 0.999                   | 0.811                 | 0.851                   | 0.999                     | 0.974                          | 0.993                 | 0.946                        | 0.996                        |
| C181        | 0.802                  | 1.000                      | 0.998                  | 0.977                   | 0.994                  | 0.995                   | 0.992                 | 0.263                   | 0.999                     | 0.952                          | 0.993                 | 0.968                        | 0.996                        |
| C2          | 0.802                  | 1.000                      | 0.998                  | 0.967                   | 0.994                  | 0.995                   | 0.754                 | 0.499                   | 0.999                     | 0.946                          | 0.993                 | 0.968                        | 0.996                        |
| C3          | 0.802                  | 1.000                      | 0.998                  | 0.967                   | 0.994                  | 0.995                   | 0.754                 | 0.372                   | 0.999                     | 0.946                          | 0.993                 | 0.946                        | 0.996                        |
| C5          | 0.806                  | 1.000                      | 0.998                  | 0.967                   | 0.994                  | 0.995                   | 0.808                 | 0.356                   | 0.999                     | 0.946                          | 0.993                 | 0.946                        | 0.996                        |
| C51DC       | 0.802                  | 1.000                      | 0.998                  | 0.414                   | 0.994                  | 0.995                   | 0.754                 | 0.622                   | 0.999                     | 0.946                          | 0.993                 | 0.946                        | 0.996                        |
| C7DC        | 0.996                  | 1.000                      | 0.998                  | 0.967                   | 0.994                  | 0.995                   | 0.783                 | 0.113                   | 0.999                     | 0.946                          | 0.993                 | 0.961                        | 0.996                        |
| Ala         | 0.802                  | 1.000                      | 0.998                  | 0.967                   | 0.994                  | 0.995                   | 0.754                 | 0.298                   | 0.999                     | 0.946                          | 0.993                 | 0.946                        | 0.996                        |
| Arg         | 0.850                  | 1.000                      | 0.998                  | 0.967                   | 0.994                  | 0.995                   | 0.754                 | 0.134                   | 0.999                     | 0.946                          | 0.993                 | 0.800                        | 0.996                        |
| Asn         | 0.996                  | 1.000                      | 0.998                  | 0.967                   | 0.994                  | 0.995                   | 0.754                 | 0.365                   | 0.999                     | 0.946                          | 0.993                 | 0.800                        | 0.996                        |
| Asp         | 0.802                  | 1.000                      | 0.998                  | 0.998                   | 0.994                  | 0.995                   | 0.754                 | 0.356                   | 0.999                     | 0.946                          | 0.993                 | 0.946                        | 0.996                        |
| Cit         | 0.802                  | 1.000                      | 0.998                  | 0.967                   | 0.994                  | 0.995                   | 0.754                 | 0.581                   | 0.999                     | 0.946                          | 0.993                 | 0.946                        | 0.996                        |
| Gln         | 0.996                  | 1.000                      | 0.998                  | 0.967                   | 0.994                  | 0.995                   | 0.868                 | 0.134                   | 0.999                     | 0.952                          | 0.993                 | 0.946                        | 0.996                        |
| Glu         | 0.802                  | 1.000                      | 0.998                  | 0.967                   | 0.028*                 | 0.995                   | 0.754                 | 0.810                   | 0.999                     | 0.946                          | 0.993                 | 0.946                        | 0.996                        |
| Gly         | 0.802                  | 1.000                      | 0.998                  | 0.967                   | 0.994                  | 0.995                   | 0.857                 | 0.302                   | 0.999                     | 0.946                          | 0.993                 | 0.963                        | 0.996                        |
| His         | 0.900                  | 1.000                      | 0.998                  | 0.967                   | 0.994                  | 0.995                   | 0.822                 | 0.208                   | 0.999                     | 0.946                          | 0.993                 | 0.946                        | 0.996                        |
| Ile         | 0.996                  | 1.000                      | 0.998                  | 0.967                   | 0.994                  | 0.995                   | 0.754                 | 0.450                   | 0.999                     | 0.946                          | 0.993                 | 0.552                        | 0.996                        |
| Leu         | 0.802                  | 1.000                      | 0.998                  | 0.967                   | 0.994                  | 0.995                   | 0.934                 | 0.554                   | 0.999                     | 0.946                          | 0.993                 | 0.946                        | 0.996                        |
| Lys         | 0.802                  | 1.000                      | 0.998                  | 0.967                   | 0.994                  | 0.995                   | 0.754                 | 0.292                   | 0.999                     | 0.946                          | 0.993                 | 0.946                        | 0.996                        |
| Met         | 0.802                  | 1.000                      | 0.998                  | 0.967                   | 0.994                  | 0.995                   | 0.754                 | 0.107                   | 0.999                     | 0.946                          | 0.993                 | 0.800                        | 0.996                        |
| Orn         | 0.802                  | 1.000                      | 0.998                  | 0.967                   | 0.994                  | 0.995                   | 0.947                 | 0.134                   | 0.999                     | 0.946                          | 0.993                 | 0.946                        | 0.996                        |
| Phe         | 0.996                  | 1.000                      | 0.998                  | 0.967                   | 0.994                  | 0.995                   | 0.754                 | 0.134                   | 0.999                     | 0.946                          | 0.993                 | 0.946                        | 0.996                        |
| Pro         | 0.806                  | 1.000                      | 0.998                  | 0.967                   | 0.994                  | 0.995                   | 0.898                 | 0.499                   | 0.999                     | 0.946                          | 0.993                 | 0.946                        | 0.996                        |

|             |       |       |       |       |       |       |       |       |       |       |       |       |       |
|-------------|-------|-------|-------|-------|-------|-------|-------|-------|-------|-------|-------|-------|-------|
| Ser         | 0.996 | 1.000 | 0.998 | 0.967 | 0.994 | 0.995 | 0.783 | 0.120 | 0.999 | 0.952 | 0.993 | 0.946 | 0.996 |
| Thr         | 0.802 | 1.000 | 0.998 | 0.967 | 0.994 | 0.995 | 0.754 | 0.134 | 0.999 | 0.946 | 0.993 | 0.946 | 0.996 |
| Trp         | 0.802 | 1.000 | 0.998 | 0.967 | 0.994 | 0.995 | 0.772 | 0.136 | 0.999 | 0.946 | 0.993 | 0.949 | 0.996 |
| Tyr         | 0.996 | 1.000 | 0.998 | 0.967 | 0.994 | 0.995 | 0.754 | 0.188 | 0.999 | 0.946 | 0.993 | 0.946 | 0.996 |
| Val         | 0.996 | 1.000 | 0.998 | 0.967 | 0.994 | 0.995 | 0.754 | 0.102 | 0.999 | 0.946 | 0.993 | 0.946 | 0.996 |
| ADMA        | 0.802 | 1.000 | 0.998 | 0.967 | 0.994 | 0.995 | 0.754 | 0.581 | 0.999 | 0.946 | 0.993 | 0.946 | 0.996 |
| Creatine    | 0.820 | 1.000 | 0.998 | 0.977 | 0.994 | 0.995 | 0.992 | 0.851 | 0.999 | 0.946 | 0.993 | 0.946 | 0.996 |
| Kynurenine  | 0.802 | 1.000 | 0.998 | 0.967 | 0.994 | 0.995 | 0.916 | 0.102 | 0.999 | 0.946 | 0.993 | 0.949 | 0.996 |
| MetSO       | 0.802 | 1.000 | 0.998 | 0.967 | 0.994 | 0.995 | 0.772 | 0.939 | 0.999 | 0.974 | 0.993 | 0.968 | 0.996 |
| Putrescine  | 0.875 | 1.000 | 0.998 | 0.977 | 0.994 | 0.995 | 0.920 | 0.255 | 0.999 | 0.946 | 0.993 | 0.946 | 0.996 |
| Sarcosine   | 0.996 | 1.000 | 0.998 | 0.967 | 0.994 | 0.995 | 0.783 | 0.763 | 0.999 | 0.946 | 0.993 | 0.946 | 0.996 |
| Serotonin   | 0.933 | 1.000 | 0.998 | 0.967 | 0.994 | 0.999 | 0.783 | 0.933 | 0.999 | 0.946 | 0.993 | 0.946 | 0.996 |
| Spermidine  | 0.802 | 1.000 | 0.998 | 0.967 | 0.994 | 0.995 | 0.754 | 0.248 | 0.999 | 0.946 | 0.993 | 0.946 | 0.996 |
| Spermine    | 0.802 | 1.000 | 0.998 | 0.967 | 0.994 | 0.995 | 0.981 | 0.581 | 0.999 | 0.946 | 0.993 | 0.946 | 0.996 |
| t4OHPro     | 0.802 | 1.000 | 0.998 | 0.977 | 0.552 | 0.995 | 0.903 | 0.520 | 0.999 | 0.946 | 0.993 | 0.946 | 0.996 |
| Taurine     | 0.821 | 1.000 | 0.998 | 0.967 | 0.897 | 0.995 | 0.754 | 0.148 | 0.999 | 0.946 | 0.993 | 0.946 | 0.996 |
| SDMA        | 0.806 | 1.000 | 0.998 | 0.967 | 0.994 | 0.995 | 0.790 | 0.302 | 0.999 | 0.946 | 0.993 | 0.963 | 0.996 |
| lysoPCaC160 | 0.802 | 1.000 | 0.998 | 0.967 | 0.994 | 0.995 | 0.783 | 0.134 | 0.999 | 0.985 | 0.993 | 0.946 | 0.996 |
| lysoPCaC161 | 0.802 | 1.000 | 0.998 | 0.967 | 0.994 | 0.995 | 0.754 | 0.302 | 0.999 | 0.946 | 0.993 | 0.946 | 0.996 |
| lysoPCaC170 | 0.802 | 1.000 | 0.998 | 0.967 | 0.994 | 0.995 | 0.754 | 0.134 | 0.999 | 0.946 | 0.993 | 0.946 | 0.996 |
| lysoPCaC180 | 0.802 | 1.000 | 0.998 | 0.967 | 0.994 | 0.995 | 0.811 | 0.134 | 0.999 | 0.974 | 0.993 | 0.946 | 0.996 |
| lysoPCaC181 | 0.802 | 1.000 | 0.998 | 0.967 | 0.994 | 0.995 | 0.754 | 0.140 | 0.999 | 0.946 | 0.993 | 0.949 | 0.996 |
| lysoPCaC182 | 0.808 | 1.000 | 0.998 | 0.967 | 0.994 | 0.995 | 0.754 | 0.134 | 0.999 | 0.946 | 0.993 | 0.946 | 0.996 |
| lysoPCaC203 | 0.968 | 1.000 | 0.998 | 0.967 | 0.994 | 0.995 | 0.754 | 0.102 | 0.999 | 0.952 | 0.993 | 0.946 | 0.996 |
| lysoPCaC204 | 0.802 | 1.000 | 0.998 | 0.967 | 0.994 | 0.995 | 0.754 | 0.298 | 0.999 | 0.946 | 0.993 | 0.968 | 0.996 |
| lysoPCaC240 | 0.802 | 1.000 | 0.998 | 0.973 | 0.994 | 0.995 | 0.754 | 0.813 | 0.999 | 0.952 | 0.993 | 0.968 | 0.996 |
| lysoPCaC260 | 0.802 | 1.000 | 0.998 | 0.967 | 0.994 | 0.995 | 0.754 | 0.520 | 0.999 | 0.946 | 0.993 | 0.946 | 0.996 |
| lysoPCaC261 | 0.802 | 1.000 | 0.998 | 0.967 | 0.994 | 0.995 | 0.754 | 0.381 | 0.999 | 0.946 | 0.993 | 0.946 | 0.996 |
| lysoPCaC280 | 0.802 | 1.000 | 0.998 | 0.967 | 0.994 | 0.995 | 0.754 | 0.965 | 0.999 | 0.946 | 0.993 | 0.946 | 0.996 |
| lysoPCaC281 | 0.802 | 1.000 | 0.998 | 0.967 | 0.994 | 0.995 | 0.754 | 0.292 | 0.999 | 0.946 | 0.993 | 0.946 | 0.996 |
| PCaaC240    | 0.802 | 1.000 | 0.998 | 0.967 | 0.994 | 0.995 | 0.754 | 0.838 | 0.999 | 0.946 | 0.993 | 0.946 | 0.996 |
| PCaaC281    | 0.802 | 1.000 | 0.998 | 0.967 | 0.994 | 0.995 | 0.754 | 0.102 | 0.999 | 0.946 | 0.993 | 0.946 | 0.996 |
| PCaaC300    | 0.802 | 1.000 | 0.998 | 0.967 | 0.994 | 0.995 | 0.754 | 0.146 | 0.999 | 0.946 | 0.993 | 0.946 | 0.996 |
| PCaaC320    | 0.802 | 1.000 | 0.998 | 0.967 | 0.994 | 0.995 | 0.754 | 0.179 | 0.999 | 0.946 | 0.993 | 0.949 | 0.996 |

|          |       |       |       |       |       |       |       |       |       |       |       |       |       |
|----------|-------|-------|-------|-------|-------|-------|-------|-------|-------|-------|-------|-------|-------|
| PCaaC321 | 0.802 | 1.000 | 0.998 | 0.967 | 0.994 | 0.999 | 0.754 | 0.102 | 0.999 | 0.946 | 0.993 | 0.963 | 0.996 |
| PCaaC323 | 0.802 | 1.000 | 0.998 | 0.967 | 0.994 | 0.995 | 0.754 | 0.188 | 0.999 | 0.946 | 0.993 | 0.968 | 0.996 |
| PCaaC341 | 0.802 | 1.000 | 0.998 | 0.967 | 0.994 | 0.995 | 0.772 | 0.114 | 0.999 | 0.946 | 0.993 | 0.968 | 0.996 |
| PCaaC342 | 0.802 | 1.000 | 0.998 | 0.967 | 0.994 | 0.995 | 0.754 | 0.102 | 0.999 | 0.946 | 0.993 | 0.946 | 0.996 |
| PCaaC343 | 0.802 | 1.000 | 0.998 | 0.967 | 0.994 | 0.995 | 0.783 | 0.107 | 0.999 | 0.946 | 0.993 | 0.968 | 0.996 |
| PCaaC344 | 0.802 | 1.000 | 0.998 | 0.967 | 0.994 | 0.995 | 0.783 | 0.131 | 0.999 | 0.946 | 0.993 | 0.963 | 0.996 |
| PCaaC360 | 0.802 | 1.000 | 0.998 | 0.967 | 0.994 | 0.995 | 0.979 | 0.302 | 0.999 | 0.946 | 0.690 | 0.946 | 0.996 |
| PCaaC361 | 0.802 | 1.000 | 0.998 | 0.967 | 0.994 | 0.995 | 0.772 | 0.114 | 0.999 | 0.946 | 0.993 | 0.963 | 0.996 |
| PCaaC362 | 0.802 | 1.000 | 0.998 | 0.967 | 0.994 | 0.995 | 0.754 | 0.102 | 0.999 | 0.946 | 0.993 | 0.946 | 0.996 |
| PCaaC363 | 0.802 | 1.000 | 0.998 | 0.967 | 0.994 | 0.995 | 0.754 | 0.102 | 0.999 | 0.946 | 0.993 | 0.946 | 0.996 |
| PCaaC364 | 0.802 | 1.000 | 0.998 | 0.967 | 0.994 | 0.995 | 0.772 | 0.102 | 0.999 | 0.946 | 0.993 | 0.946 | 0.996 |
| PCaaC365 | 0.821 | 1.000 | 0.998 | 0.967 | 0.994 | 0.995 | 0.754 | 0.102 | 0.999 | 0.946 | 0.993 | 0.946 | 0.996 |
| PCaaC366 | 0.948 | 1.000 | 0.998 | 0.967 | 0.994 | 0.995 | 0.772 | 0.212 | 0.999 | 0.946 | 0.993 | 0.946 | 0.996 |
| PCaaC380 | 0.802 | 1.000 | 0.998 | 0.967 | 0.994 | 0.995 | 0.988 | 0.134 | 0.999 | 0.946 | 0.993 | 0.968 | 0.996 |
| PCaaC383 | 0.802 | 1.000 | 0.998 | 0.998 | 0.994 | 0.995 | 0.754 | 0.102 | 0.999 | 0.946 | 0.993 | 0.946 | 0.996 |
| PCaaC384 | 0.821 | 1.000 | 0.998 | 0.967 | 0.994 | 0.995 | 0.754 | 0.102 | 0.999 | 0.946 | 0.993 | 0.946 | 0.997 |
| PCaaC385 | 0.802 | 1.000 | 0.998 | 0.977 | 0.994 | 0.995 | 0.783 | 0.108 | 0.999 | 0.946 | 0.993 | 0.946 | 0.996 |
| PCaaC386 | 0.868 | 1.000 | 0.998 | 0.967 | 0.994 | 0.995 | 0.754 | 0.102 | 0.999 | 0.946 | 0.993 | 0.946 | 0.996 |
| PCaaC402 | 0.802 | 1.000 | 0.998 | 0.967 | 0.994 | 0.995 | 0.754 | 0.851 | 0.999 | 0.946 | 0.993 | 0.946 | 0.996 |
| PCaaC403 | 0.802 | 1.000 | 0.998 | 0.967 | 0.994 | 0.995 | 0.783 | 0.263 | 0.999 | 0.946 | 0.993 | 0.946 | 0.996 |
| PCaaC404 | 0.996 | 1.000 | 0.998 | 0.977 | 0.994 | 0.995 | 0.754 | 0.134 | 0.999 | 0.946 | 0.993 | 0.946 | 0.996 |
| PCaaC405 | 0.802 | 1.000 | 0.998 | 0.977 | 0.994 | 0.995 | 0.808 | 0.134 | 0.999 | 0.946 | 0.993 | 0.963 | 0.996 |
| PCaaC406 | 0.802 | 1.000 | 0.998 | 0.967 | 0.994 | 0.995 | 0.754 | 0.102 | 0.999 | 0.946 | 0.993 | 0.946 | 0.996 |
| PCaaC420 | 0.996 | 1.000 | 0.998 | 0.967 | 0.994 | 0.995 | 0.903 | 0.105 | 0.999 | 0.946 | 0.993 | 0.946 | 0.996 |
| PCaaC421 | 0.875 | 1.000 | 0.998 | 0.967 | 0.994 | 0.995 | 0.908 | 0.581 | 0.999 | 0.946 | 0.993 | 0.946 | 0.996 |
| PCaaC422 | 0.802 | 1.000 | 0.998 | 0.967 | 0.994 | 0.995 | 0.783 | 0.528 | 0.999 | 0.946 | 0.993 | 0.946 | 0.996 |
| PCaaC424 | 0.802 | 1.000 | 0.998 | 0.967 | 0.994 | 0.995 | 0.997 | 0.686 | 0.999 | 0.946 | 0.993 | 0.972 | 0.996 |
| PCaaC425 | 0.996 | 1.000 | 0.998 | 0.973 | 0.994 | 0.995 | 0.771 | 0.340 | 0.999 | 0.946 | 0.993 | 0.946 | 0.996 |
| PCaaC426 | 0.968 | 1.000 | 0.998 | 0.967 | 0.994 | 0.995 | 0.754 | 0.298 | 0.999 | 0.946 | 0.993 | 0.973 | 0.996 |
| PCaeC300 | 0.802 | 1.000 | 0.998 | 0.967 | 0.994 | 0.995 | 0.754 | 0.146 | 0.999 | 0.946 | 0.993 | 0.946 | 0.996 |
| PCaeC301 | 0.802 | 1.000 | 0.998 | 0.967 | 0.994 | 0.995 | 0.772 | 0.248 | 0.999 | 0.952 | 0.993 | 0.968 | 0.996 |
| PCaeC302 | 0.802 | 1.000 | 0.998 | 0.967 | 0.994 | 0.995 | 0.754 | 0.334 | 0.999 | 0.946 | 0.993 | 0.946 | 0.996 |
| PCaeC321 | 0.802 | 1.000 | 0.998 | 0.967 | 0.994 | 0.995 | 0.754 | 0.148 | 0.999 | 0.946 | 0.993 | 0.946 | 0.996 |
| PCaeC322 | 0.802 | 1.000 | 0.998 | 0.973 | 0.994 | 0.995 | 0.771 | 0.175 | 0.999 | 0.946 | 0.993 | 0.946 | 0.996 |

|          |       |       |       |       |       |       |       |       |       |       |       |       |       |
|----------|-------|-------|-------|-------|-------|-------|-------|-------|-------|-------|-------|-------|-------|
| PCaeC340 | 0.802 | 1.000 | 0.998 | 0.967 | 0.994 | 0.995 | 0.754 | 0.102 | 0.999 | 0.946 | 0.993 | 0.981 | 0.996 |
| PCaeC341 | 0.802 | 1.000 | 0.998 | 0.967 | 0.994 | 0.995 | 0.754 | 0.134 | 0.999 | 0.946 | 0.993 | 0.946 | 0.996 |
| PCaeC342 | 0.873 | 1.000 | 0.998 | 0.967 | 0.994 | 0.995 | 0.754 | 0.102 | 0.999 | 0.946 | 0.993 | 0.946 | 0.996 |
| PCaeC343 | 0.996 | 1.000 | 0.998 | 0.967 | 0.994 | 0.995 | 0.754 | 0.120 | 0.999 | 0.946 | 0.993 | 0.946 | 0.996 |
| PCaeC360 | 0.996 | 1.000 | 0.998 | 0.977 | 0.994 | 0.995 | 0.754 | 0.292 | 0.999 | 0.946 | 0.993 | 0.946 | 0.996 |
| PCaeC361 | 0.968 | 1.000 | 0.998 | 0.967 | 0.994 | 0.999 | 0.754 | 0.102 | 0.999 | 0.946 | 0.993 | 0.946 | 0.996 |
| PCaeC362 | 0.802 | 1.000 | 0.998 | 0.967 | 0.994 | 0.995 | 0.754 | 0.120 | 0.999 | 0.985 | 0.993 | 0.946 | 0.996 |
| PCaeC363 | 0.996 | 1.000 | 0.998 | 0.973 | 0.994 | 0.995 | 0.754 | 0.134 | 0.999 | 0.946 | 0.993 | 0.946 | 0.996 |
| PCaeC364 | 0.939 | 1.000 | 0.998 | 0.967 | 0.994 | 0.995 | 0.754 | 0.102 | 0.999 | 0.946 | 0.993 | 0.946 | 0.996 |
| PCaeC365 | 0.996 | 1.000 | 0.998 | 0.967 | 0.994 | 0.995 | 0.754 | 0.102 | 0.999 | 0.946 | 0.993 | 0.946 | 0.996 |
| PCaeC380 | 0.802 | 1.000 | 0.998 | 0.967 | 0.994 | 0.995 | 0.988 | 0.296 | 0.999 | 0.946 | 0.993 | 0.949 | 0.996 |
| PCaeC381 | 0.996 | 1.000 | 0.998 | 0.967 | 0.994 | 0.995 | 0.754 | 0.188 | 0.999 | 0.946 | 0.993 | 0.946 | 0.996 |
| PCaeC382 | 0.982 | 1.000 | 0.998 | 0.967 | 0.994 | 0.995 | 0.754 | 0.263 | 0.999 | 0.946 | 0.993 | 0.800 | 0.996 |
| PCaeC383 | 0.996 | 1.000 | 0.998 | 0.967 | 0.994 | 0.995 | 0.754 | 0.134 | 0.999 | 0.946 | 0.993 | 0.946 | 0.996 |
| PCaeC384 | 0.996 | 1.000 | 0.998 | 0.967 | 0.994 | 0.995 | 0.754 | 0.134 | 0.999 | 0.946 | 0.993 | 0.946 | 0.996 |
| PCaeC385 | 0.996 | 1.000 | 0.998 | 0.967 | 0.994 | 0.995 | 0.754 | 0.102 | 0.999 | 0.946 | 0.993 | 0.946 | 0.996 |
| PCaeC386 | 0.900 | 1.000 | 0.998 | 0.967 | 0.994 | 0.995 | 0.754 | 0.102 | 0.999 | 0.946 | 0.993 | 0.946 | 0.996 |
| PCaeC401 | 0.802 | 1.000 | 0.998 | 0.997 | 0.994 | 0.995 | 0.754 | 0.302 | 0.999 | 0.946 | 0.993 | 0.946 | 0.996 |
| PCaeC402 | 0.802 | 1.000 | 0.998 | 0.967 | 0.994 | 0.995 | 0.754 | 0.513 | 0.999 | 0.946 | 0.993 | 0.946 | 0.996 |
| PCaeC403 | 0.802 | 1.000 | 0.998 | 0.967 | 0.994 | 0.995 | 0.754 | 0.231 | 0.999 | 0.946 | 0.993 | 0.946 | 0.996 |
| PCaeC404 | 0.802 | 1.000 | 0.998 | 0.967 | 0.994 | 0.995 | 0.754 | 0.102 | 0.999 | 0.946 | 0.993 | 0.946 | 0.996 |
| PCaeC405 | 0.968 | 1.000 | 0.998 | 0.967 | 0.994 | 0.995 | 0.754 | 0.134 | 0.999 | 0.946 | 0.993 | 0.946 | 0.996 |
| PCaeC406 | 0.996 | 1.000 | 0.998 | 0.967 | 0.994 | 0.995 | 0.754 | 0.102 | 0.999 | 0.946 | 0.993 | 0.946 | 0.996 |
| PCaeC421 | 0.948 | 1.000 | 0.998 | 0.967 | 0.994 | 0.995 | 0.772 | 0.450 | 0.999 | 0.946 | 0.993 | 0.946 | 0.996 |
| PCaeC422 | 0.802 | 1.000 | 0.998 | 0.967 | 0.994 | 0.995 | 0.754 | 0.851 | 0.999 | 0.946 | 0.993 | 0.946 | 0.996 |
| PCaeC423 | 0.948 | 1.000 | 0.998 | 0.967 | 0.994 | 0.995 | 0.754 | 0.292 | 0.999 | 0.946 | 0.993 | 0.946 | 0.996 |
| PCaeC424 | 0.802 | 1.000 | 0.998 | 0.967 | 0.994 | 0.995 | 0.754 | 0.134 | 0.999 | 0.946 | 0.993 | 0.968 | 0.996 |
| PCaeC425 | 0.968 | 1.000 | 0.998 | 0.967 | 0.994 | 0.995 | 0.754 | 0.134 | 0.999 | 0.946 | 0.993 | 0.946 | 0.996 |
| PCaeC443 | 0.868 | 1.000 | 0.998 | 0.967 | 0.994 | 0.995 | 0.771 | 0.986 | 0.999 | 0.946 | 0.993 | 0.946 | 0.996 |
| PCaeC444 | 0.996 | 1.000 | 0.998 | 0.967 | 0.994 | 0.995 | 0.790 | 0.866 | 0.999 | 0.946 | 0.993 | 0.993 | 0.996 |
| PCaeC445 | 0.996 | 1.000 | 0.998 | 0.967 | 0.994 | 0.995 | 0.772 | 0.102 | 0.999 | 0.946 | 0.993 | 0.946 | 0.996 |
| PCaeC446 | 0.802 | 1.000 | 0.998 | 0.967 | 0.994 | 0.995 | 0.754 | 0.102 | 0.999 | 0.946 | 0.993 | 0.946 | 0.996 |
| SMOHC141 | 0.968 | 1.000 | 0.998 | 0.967 | 0.994 | 0.995 | 0.754 | 0.102 | 0.999 | 0.946 | 0.993 | 0.946 | 0.996 |
| SMOHC161 | 0.802 | 1.000 | 0.998 | 0.967 | 0.994 | 0.995 | 0.754 | 0.292 | 0.999 | 0.974 | 0.993 | 0.946 | 0.996 |

|          |       |       |       |       |       |       |       |       |       |       |       |       |       |
|----------|-------|-------|-------|-------|-------|-------|-------|-------|-------|-------|-------|-------|-------|
| SMOHC221 | 0.996 | 1.000 | 0.998 | 0.967 | 0.414 | 0.995 | 0.916 | 0.265 | 0.999 | 0.946 | 0.993 | 0.946 | 0.996 |
| SMOHC222 | 0.802 | 1.000 | 0.998 | 0.967 | 0.994 | 0.995 | 0.934 | 0.579 | 0.999 | 0.946 | 0.993 | 0.963 | 0.996 |
| SMC160   | 0.802 | 1.000 | 0.998 | 0.967 | 0.994 | 0.995 | 0.772 | 0.102 | 0.999 | 0.946 | 0.993 | 0.946 | 0.996 |
| SMC161   | 0.864 | 1.000 | 0.998 | 0.977 | 0.994 | 0.995 | 0.772 | 0.105 | 0.999 | 0.946 | 0.993 | 0.946 | 0.996 |
| SMC180   | 0.812 | 1.000 | 0.998 | 0.977 | 0.994 | 0.995 | 0.868 | 0.134 | 0.999 | 0.946 | 0.993 | 0.946 | 0.996 |
| SMC181   | 0.802 | 1.000 | 0.998 | 0.967 | 0.994 | 0.995 | 0.947 | 0.134 | 0.999 | 0.946 | 0.993 | 0.946 | 0.996 |
| SMC240   | 0.802 | 1.000 | 0.998 | 0.977 | 0.994 | 0.995 | 0.783 | 0.134 | 0.999 | 0.946 | 0.993 | 0.946 | 0.996 |
| H1       | 0.802 | 1.000 | 0.998 | 0.967 | 0.994 | 0.995 | 0.908 | 0.538 | 0.999 | 0.946 | 0.993 | 0.946 | 0.996 |

q-values are from Benjamini-Hochberg, and significant q-values are in bold and present \*q < 0.05, \*\*q < 0.01 perioperative clinical factors vs. % change in metabolites. Multi-premedication includes ranitidine, PPI, and benzodiazepine. PPI; Proton-pump inhibitor; Ala: alanine; Arg: arginine; Asn: asparagine; Asp: aspartate; Cit: citrulline ; Gln: glutamine; Glu: glutamate; Gly: glycine; His: histidine; Ile: isoleucine; Leu: leucine; Lys: lysine; Met: methionine; Orn: ornithine; Phe: phenyl-alanine; Pro: proline; Ser: serine; Thr: threonine; Trp: tryptophan; Tyr: tyrosine; Val: valine; ADMA: asymmetric dimethylarginine; SDMA:symmetric dimethylarginine; H1: hexose.

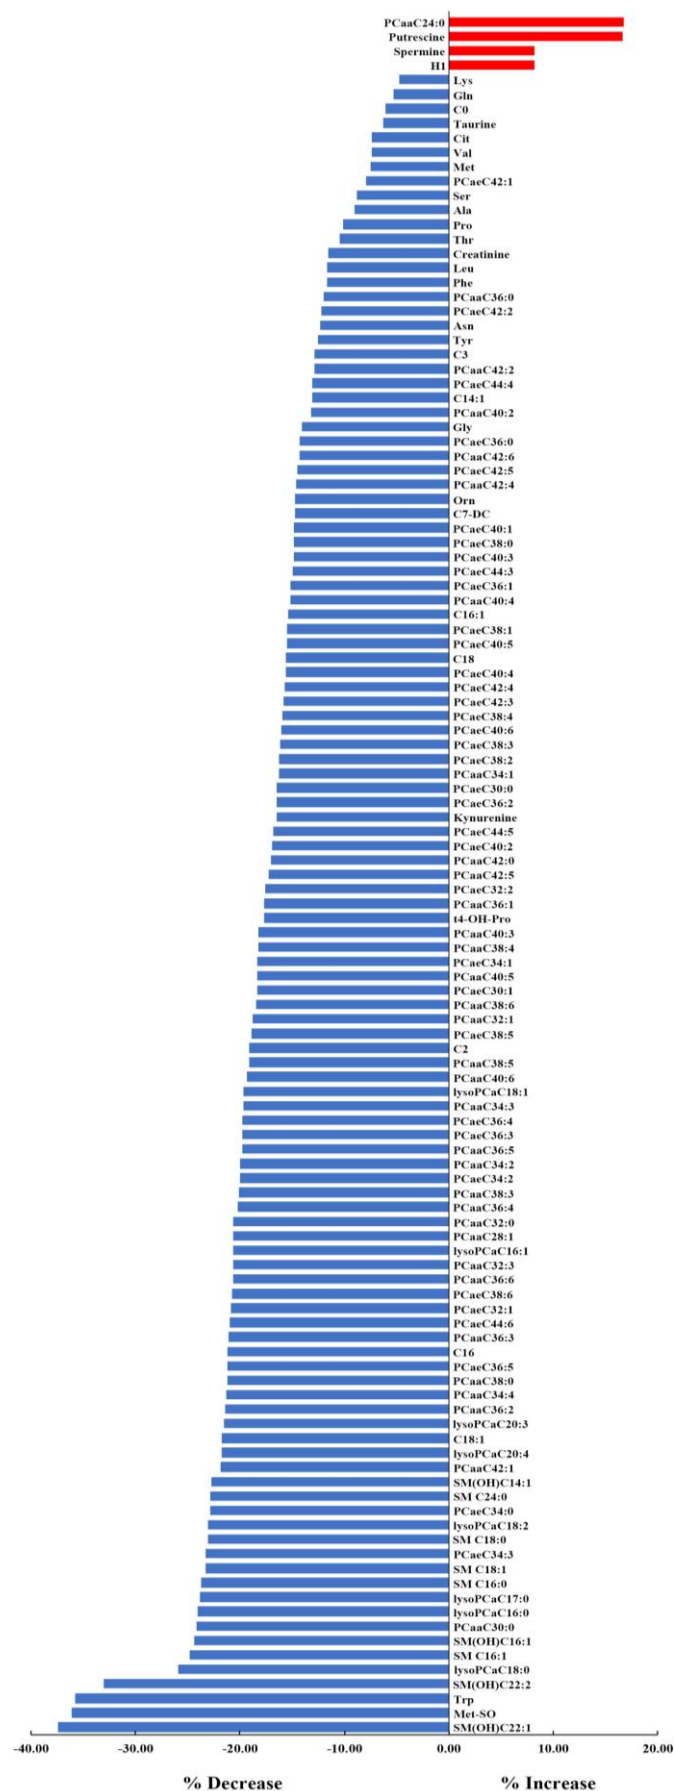

**Supplementary Figure S1.** The % change rate of 121 metabolites between pre- and post-op.
